# Supplementary material
Source: PubMed Central journal article supplement (PMC3790305)
Supplement: supp_M113.027953_mcp.M113.027953-1.pdf [file supp_M113.027953_mcp.M113.027953-1.pdf]

## The list of Supplementary Materials for the Article

### “The GlycoFilter: A Simple and Comprehensive Sample Preparation Platform for N-glycome and N-glycoproteome”

Hui Zhou, John W. Froehlich, Andrew C. Briscoe, Richard S. Lee

|                                |                                                                                                                             |
|--------------------------------|-----------------------------------------------------------------------------------------------------------------------------|
| <b>Supplementary Figure S1</b> | MALDI-MS of N-glycans of RNase B (a) 1 ug, (b) 5 ug, and (c) 10 ug                                                          |
| <b>Supplementary Figure S2</b> | MALDI-MS of Fetuin N-glycans (without acidification vs. acidification)                                                      |
| <b>Supplementary Figure S3</b> | ESI-MS and MS/MS spectra of two minor N-glycans from bovine fetuin                                                          |
| <b>Supplementary Figure S4</b> | MALDI-MS of N-glycans of serum IgG                                                                                          |
| <b>Supplementary Figure S5</b> | MALDI-MS of permethylated urinary N-glycans by extended acidic elutions and the remaining N-glycans in the protein solution |
| <b>Supplementary Figure S6</b> | Experimental workflow to determine the impact of PNGase F catalyzed de-N-glycosylation on urinary proteomic performance     |
| <b>Supplementary Figure S7</b> | MALDI-MS of N-glycans of three human plasma samples                                                                         |
| <b>Supplementary Table S1</b>  | The list of N-glycan monosaccharide composition of <b>U1</b>                                                                |
| <b>Supplementary Table S2</b>  | The list of N-glycan monosaccharide composition of <b>U2</b>                                                                |
| <b>Supplementary Table S3</b>  | The list of N-glycan monosaccharide composition of <b>U3</b>                                                                |
| <b>Supplementary Table S4</b>  | The summary of proteins identified in both preparations <b>+PNGase F</b> and <b>Control</b>                                 |
| <b>Supplementary Table S5</b>  | The list of identified glycosites from three urine samples                                                                  |

**Supplementary Table S6**

The summary of proteome and glycoproteome of three human plasma samples

**Supplementary Table S7**

The list of identified glycosites from three plasma samples

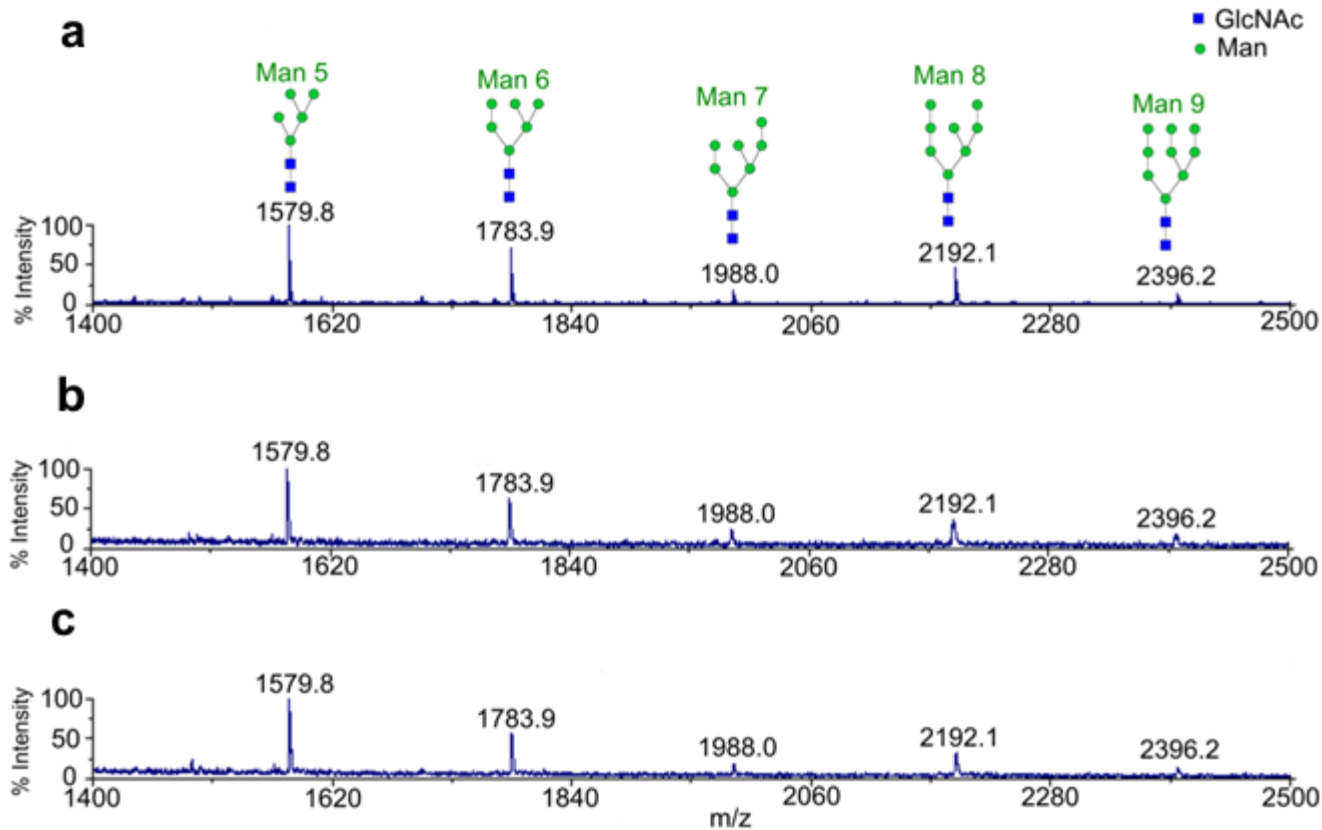

**Supplementary Figure S1** | The MALDI-MS of permethylated N-glycans from bovine RNase B at **a)** 1 ug, **b)** 5 ug, and **c)** 10 ug, which were collected separately using the GlycoFilter platform. All known high-mannose type N-glycans (**Man 5**, **Man 6**, **Man 7**, **Man 8**, and **Man 9**) were detected in all samples with the same peak intensity pattern as previously reported(1). All ions were single sodium adducts  $[M+Na]^+$  and the monoisotopic peak was annotated.

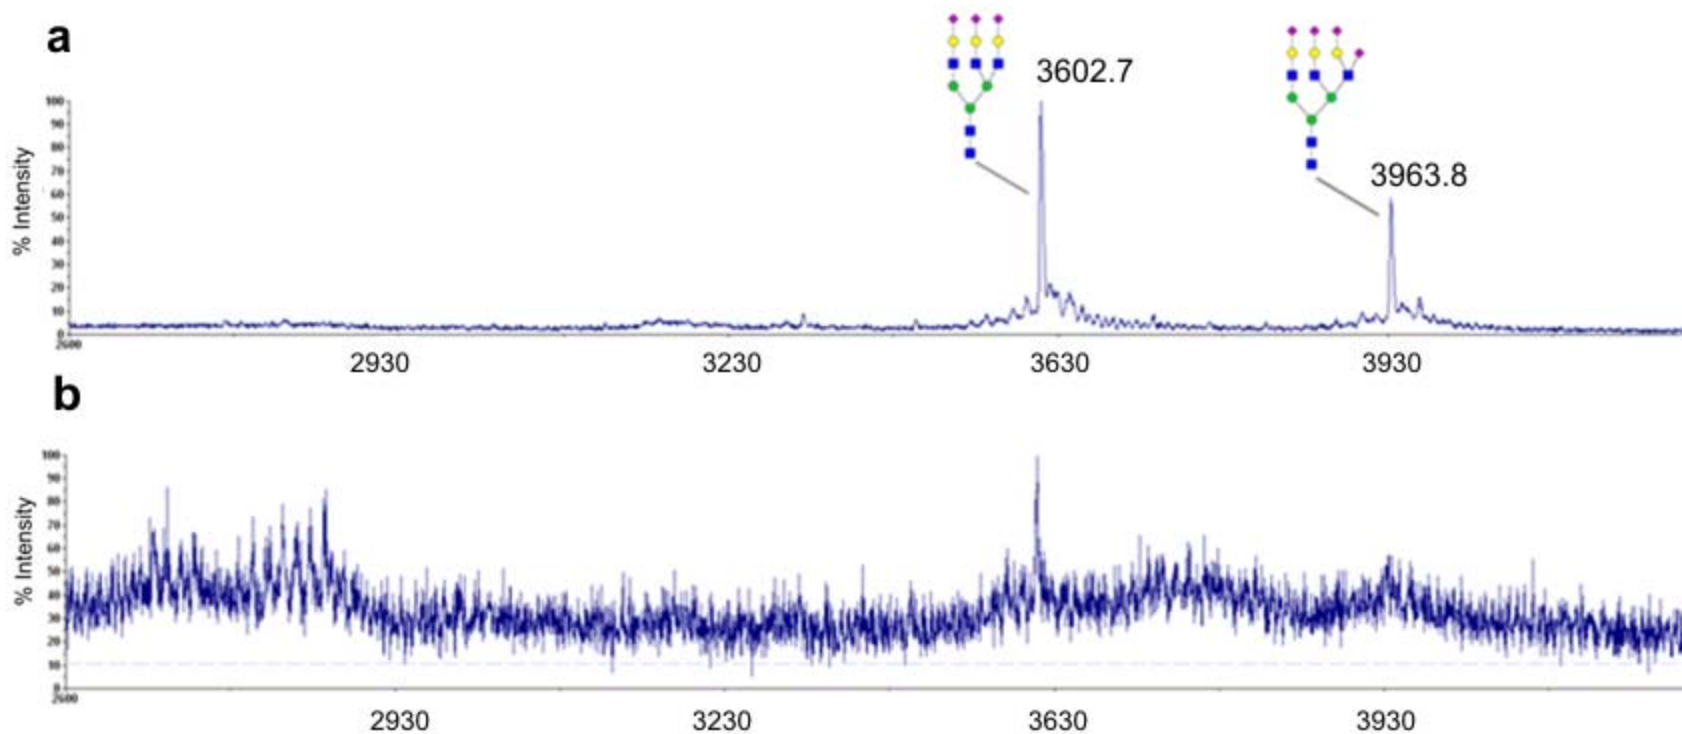

**Supplementary Figure S2** | The MALDI-MS of permethylated N-glycans of bovine fetuin. **(a)** The remaining N-glycans in the sample chamber of the filter device without acidification; and **(b)** the remaining N-glycans in the sample chamber of the filter device after acidification. Highly sialic acidic N-glycans were selectively retained in the sample chamber **(a)** due to the ionic interactions between the glycans and protein at neutral or basic conditions. After acidifying, these interactions were effectively interrupted, allowing the elution of large glycans with multiple sialic acid residues by filtration **(b)**. All ions were single sodium adducts  $[M+Na]^+$  and the monoisotopic peak was annotated.

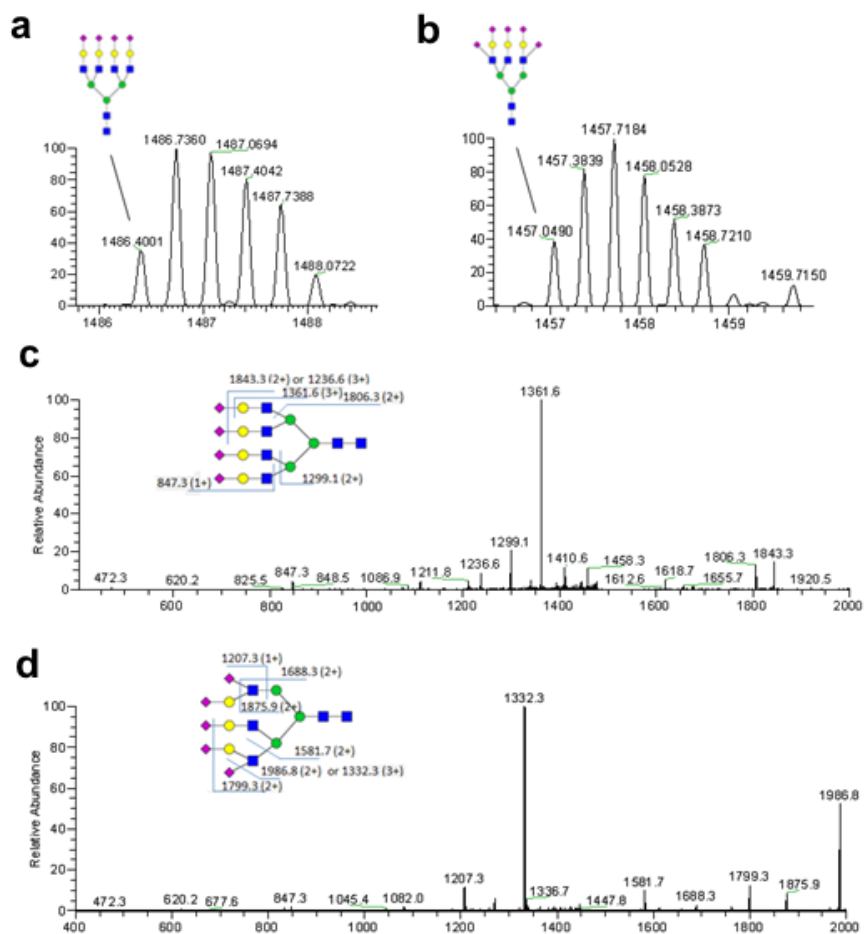

**Supplementary Figure S3** | High mass accuracy ESI-MS and CID MS/MS spectra of two unreported N-glycans released from bovine fetuin:  $m/z$  1486.4001 (3+,  $\Delta = 8$  ppm), Hex<sub>7</sub>HexNAc<sub>6</sub>Neu5Ac<sub>4</sub> (**a, c**); and  $m/z$  1457.0490 (3+,  $\Delta = 8$  ppm), Hex<sub>6</sub>HexNAc<sub>5</sub>Neu5Ac<sub>5</sub> (**b, d**). The charge state of the fragment ions are annotated in parenthesis. All ions were sodium adducts and the monoisotopic peak was annotated.

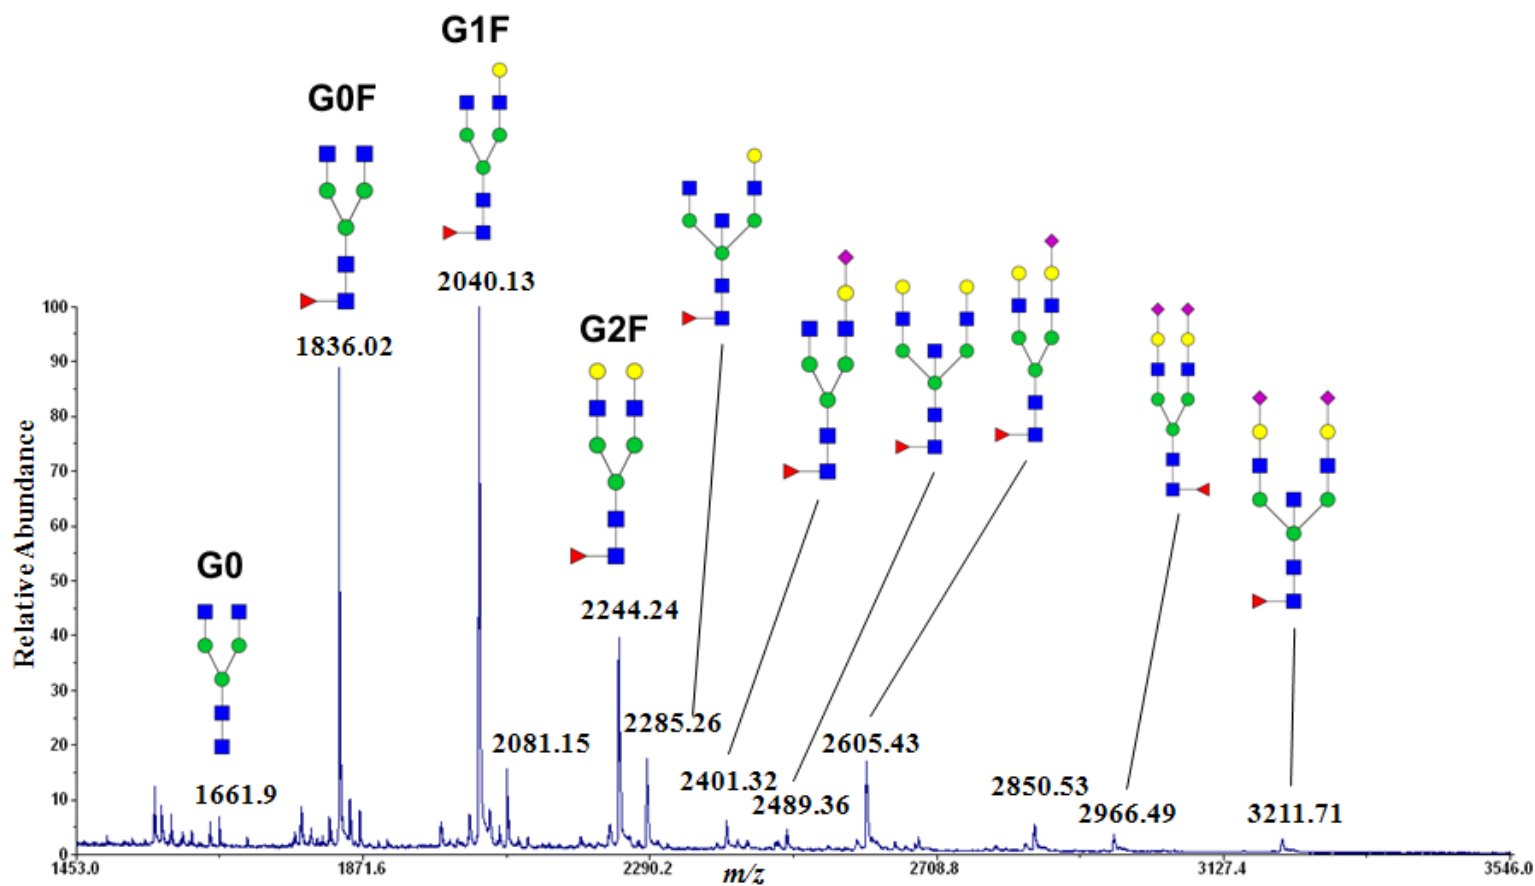

**Supplementary Figure S4** | The MALDI-MS of permethylated N-glycans from serum IgG. As expected, three IgG-type N-glycans, G0F, G1F, and G2F, are the most abundant peaks, and the overall intensity pattern and other minor components were the same as other reports (2). All ions were single sodium adducts  $[M+Na]^+$  and the monoisotopic peak was annotated.

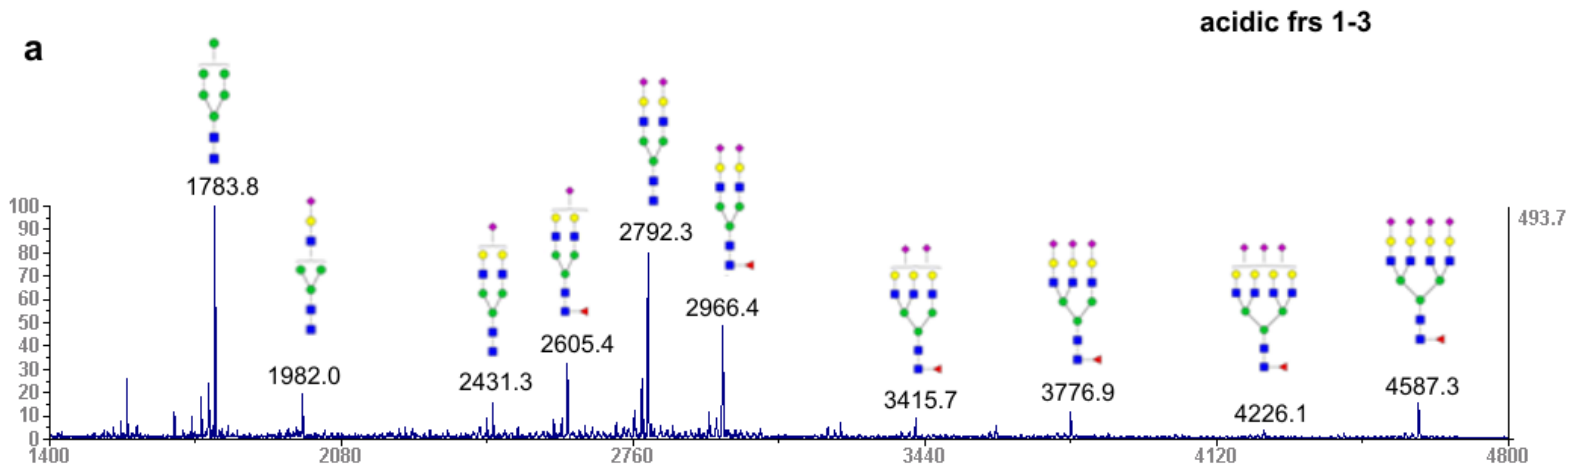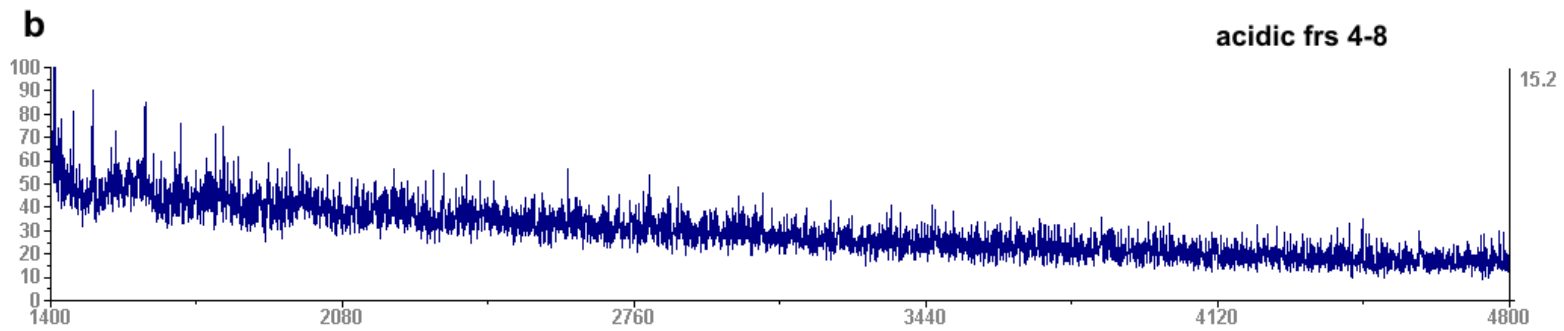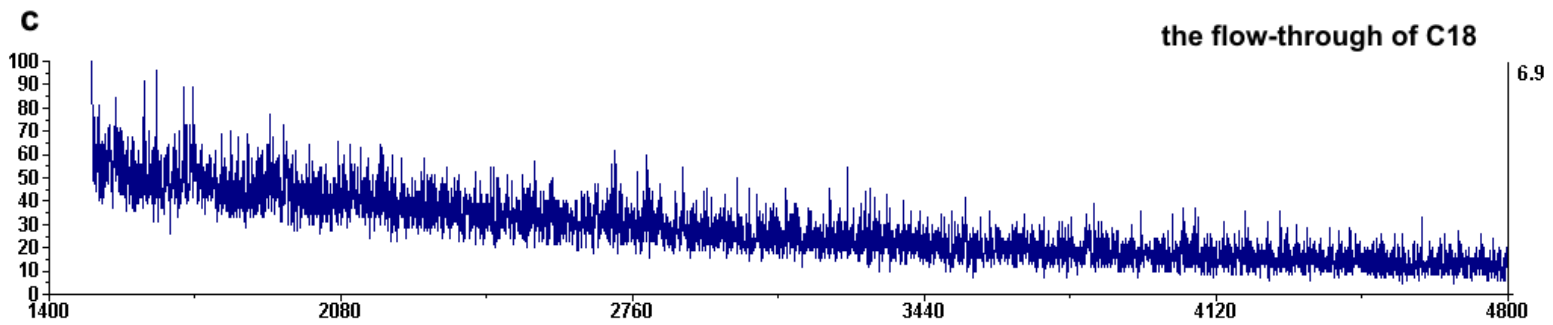

**Supplementary Figure S5** | An additional urine sample was obtained from the donor of **U1**, and processed by the GlycoFilter platform. The N-glycans were eluted by additional acidic washes (X8) to determine if there were residual glycans not captured. The initial three elutions and the remaining five elutions were respectively combined. Furthermore, the deglycosylated proteins were recovered from the sample chamber of the filter and passed through a C18 SPE cartridge to determine if there were residual glycans with the protein sample. The MALDI-MS of permethylated urinary N-glycans were depicted: **(a)** the combined first three acidic elutions; **(b)** the remaining five acidic elutions; and **(c)** the remaining N-glycans from the protein solution. It clearly demonstrates that three acidic elutions effectively separate the vast majority of urinary N-glycans (including the complex and large acidic glycans) from the proteins by filtration **(a)**. N-glycans were not detected in the additional acidic elutions **(b)**, or in the remaining protein sample processed by C18 SPE **(c)**. All ions were single sodium adducts  $[M+Na]^+$  and the monoisotopic peak was annotated.



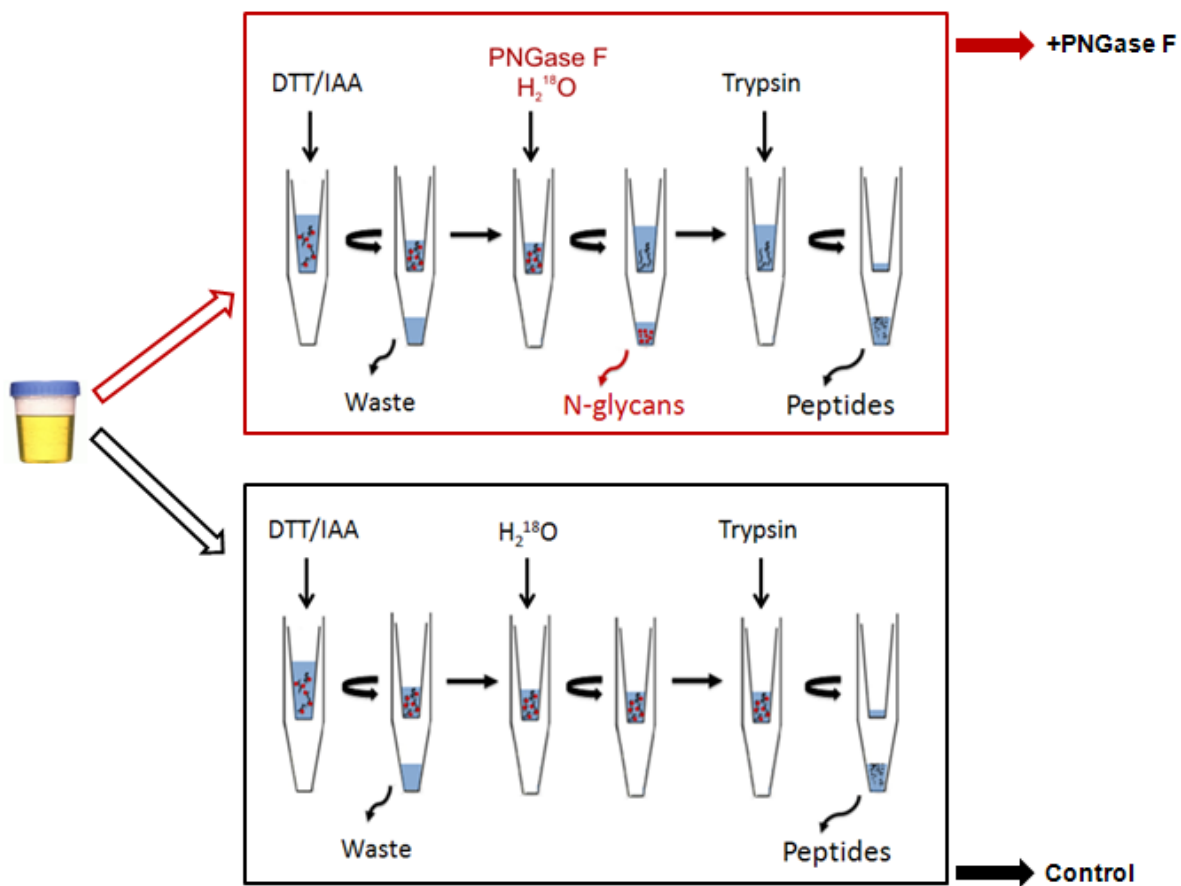

**Supplementary Figure S6** | To evaluate the impact of PNGase F on general proteomic performance, three biological urine samples were each divided into two equivalent aliquots. One aliquot was processed with the addition of PNGase F (**+PNGase F**). The other aliquot was processed in parallel except that there was no addition of PNGase F (**Control**). The peptides obtained from both aliquots were similarly analyzed by LC-MS/MS to assess the impact of PNGase F on proteomic performance. (DTT: dithiothreitol; IAA: iodoacetamide)

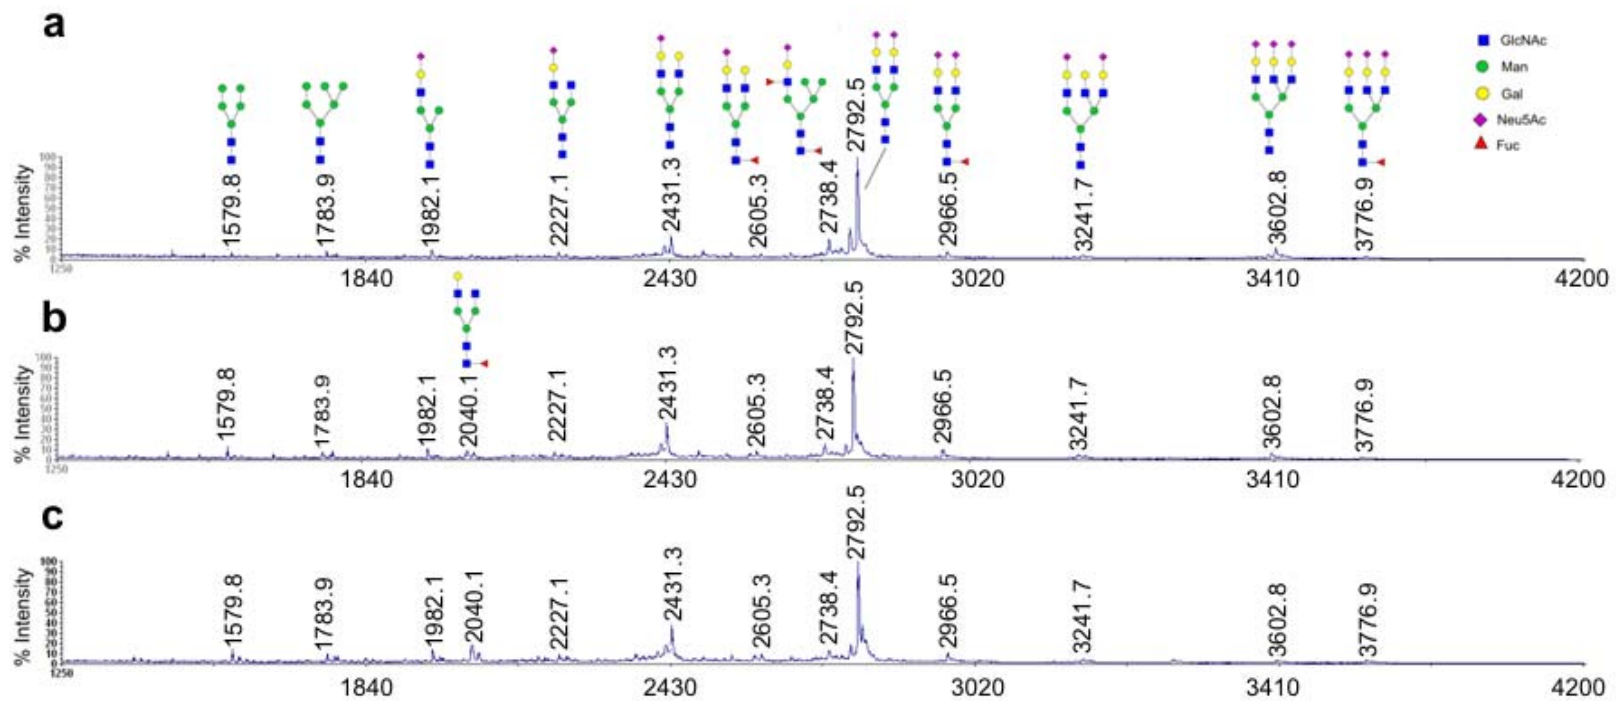

**Supplementary Figure S7** | MALDI-MS of permethylated N-glycans of three biological plasma samples **(a)** Plasma 1, **(b)** Plasma 2, and **(c)** Plasma 3 separately collected by the GlycoFilter platform. All ions were single sodium adducts  $[M+Na]^+$  and the monoisotopic peak was annotated.

**Supplementary Table S1** | The monosaccharide compositions of permethylated N-glycans from sample **U1**. The glycans were detected by high mass accuracy ESI-MS. The possible N-glycan composition was determined using the online GlycoMod tool (<http://web.expasy.org/glycomod/>) with the following parameter limits: 1) all returned compositions were assumed to have a core structure of Man<sub>3</sub>GlcNAc<sub>2</sub>, 2) all ions existed as sodium adducts, and 3) the mass error is less than 10 ppm to the theoretical calculation of proposed composition(3). No further verifications were conducted. The number in the parenthesis annotates the charge state of ions. **H** (Hex): hexose; **N** (HexNAc): N-acetyl hexosamine; **F** (Fuc): fucose; **A** (Neu5Ac): N-acetylneuraminic acid.

| Glycans | Monosaccharide composition | Theoretical (1+) | Observed (2+) | Observed (3+) |
|---------|----------------------------|------------------|---------------|---------------|
| 1       | H16N4A2                    | 5037.4812        |               | 1694.4924     |
| 2       | H8N7F1A3                   | 4675.3247        |               | 1573.77       |
| 3       | H7N6F1A4                   | 4587.2724        |               | 1544.4178     |
| 4       | H7N6A4                     | 4413.1832        |               | 1486.3867     |
| 5       | H16N4                      | 4315.1336        |               | 1453.7136     |
| 6       | H7N6F1A3                   | 4226.0986        |               | 1424.0246     |
| 7       | H6N5F1A4                   | 4138.0463        |               | 1394.6776     |
| 8       | H7N6A3                     | 4052.0094        |               | 1365.9952     |
| 9       | H6N6F1A3                   | 4021.9988        |               | 1355.9896     |
| 10      | H6N5F2A3                   | 3950.9617        |               | 1332.3132     |
| 11      | H7N6F1A2                   | 3864.9248        |               | 1303.6342     |
| 12      | H7N5A3                     | 3806.8831        |               | 1284.2864     |
| 13      | H6N5F1A3                   | 3776.8725        | 1899.9268     | 1274.2826     |
| 14      | H10N6F1                    | 3754.8766        |               | 1266.9561     |
| 15      | H7N6A2                     | 3690.8356        |               | 1245.6038     |
| 16      | H6N6F1A2                   | 3660.825         |               | 1235.6006     |
| 17      | H6N6F3A1                   | 3647.8296        |               | 1231.2625     |
| 18      | H6N5A3                     | 3602.7833        | 1812.886      | 1216.2532     |
| 19      | H7N6F1A1                   | 3503.751         |               | 1183.243      |
| 20      | H6N6A2                     | 3486.7358        |               | 1177.5708     |
| 21      | H6N6F2A1                   | 3473.7404        |               | 1173.2303     |

|    |          |           |           |           |
|----|----------|-----------|-----------|-----------|
| 22 | H7N5A2   | 3445.7093 |           | 1163.8964 |
| 23 | H6N5F1A2 | 3415.6987 | 1719.342  | 1153.8923 |
| 24 | H10N5    | 3335.6611 |           | 1127.2164 |
| 25 | H5N4F1A3 | 3327.6464 | 1675.3169 | 1124.5475 |
| 26 | H6N6F1A1 | 3299.6512 |           | 1115.2097 |
| 27 | H6N5A2   | 3241.6095 | 1632.3006 | 1095.8619 |
| 28 | H5N5F1A2 | 3211.5989 | 1617.2924 | 1085.8586 |
| 29 | H6N4F1A2 | 3170.5724 |           | 1072.1839 |
| 30 | H5N4F2A2 | 3140.5618 |           | 1062.1793 |
| 31 | H6N6A1   | 3125.562  |           | 1057.179  |
| 32 | H6N6F2   | 3112.5666 | 1567.7746 | 1052.8407 |
| 33 | H7N5A1   | 3084.5355 |           | 1043.5046 |
| 34 | H6N5F1A1 | 3054.5249 | 1538.7569 | 1033.501  |
| 35 | H5N5A2   | 3037.5097 |           | 1027.8294 |
| 36 | H5N5F2A1 | 3024.5143 | 1523.7511 | 1023.4971 |
| 37 | H4N5F1A2 | 3007.4991 |           | 1017.8246 |
| 38 | H6N4A2   | 2996.4832 | 1509.7359 | 1014.1536 |
| 39 | H5N4F1A2 | 2966.4726 | 1494.7299 | 1004.1501 |
| 40 | H6N5A1   | 2880.4357 | 1451.7097 | 975.4707  |
| 41 | H5N5F1A1 | 2850.4251 | 1436.7086 | 965.4683  |
| 42 | H5N5F3   | 2837.4297 |           | 961.1346  |
| 43 | H4N5F4   | 2807.4191 |           | 951.1247  |
| 44 | H5N4A2   | 2792.3834 | 1407.6851 | 946.1203  |
| 45 | H6N5F1   | 2693.3511 |           | 913.1102  |
| 46 | H5N5A1   | 2676.3359 | 1349.6651 | 907.4393  |
| 47 | H4N5F1A1 | 2646.3253 | 1334.6577 | 897.4326  |
| 48 | H6N4A1   | 2635.3094 | 1329.1497 | 893.7627  |
| 49 | H5N4F1A1 | 2605.2988 | 1314.1434 | 883.7587  |
| 50 | H4N4A2   | 2588.2836 | 1305.6373 |           |
| 51 | H5N3A2   | 2547.2571 | 1285.1222 | 864.4116  |
| 52 | H5N5F1   | 2489.2513 |           | 845.0767  |

|    |          |           |               |          |
|----|----------|-----------|---------------|----------|
| 53 | H4N5A1   | 2472.2361 | 1247.6106     |          |
| 54 | H5N4A1   | 2431.2096 | 1227.0989     | 825.729  |
| 55 | H4N4F1A1 | 2401.199  | 1212.0939     | 815.7257 |
| 56 | H9N2     | 2396.1824 | 1209.5819     |          |
| 57 | H6N3A1   | 2390.1831 | 1206.5847     |          |
| 58 | H5N3F1A1 | 2360.1725 | 1191.5802     |          |
| 59 | H3N6F1   | 2326.178  | 1174.5813     |          |
| 60 | H6N4     | 2274.1356 | 1148.5603     |          |
| 61 | H5N4F1   | 2244.125  | 1133.5577     |          |
| 62 | H4N4F1   | 2040.0252 | 1031.5117     |          |
| 63 | H4N4A1   | 2227.1098 | 1125.0487     |          |
| 64 | H3N4F1A1 | 2197.0992 | 1110.0443     |          |
| 65 | H8N2     | 2192.0826 | 1107.5344     |          |
| 66 | H5N3A1   | 2186.0833 | 1104.5356     |          |
| 67 | H4N3F1A1 | 2156.0727 | 1089.5306     |          |
| 68 | H3N3A2   | 2139.0575 | 1081.0231     |          |
| 69 | H4N5     | 2111.0623 | 1067.0246     |          |
| 70 | H5N4     | 2070.0358 | 1046.5129     |          |
| 71 | H7N2     | 1987.9828 | 1987.979 (1)  |          |
| 72 | H4N3A1   | 1981.9835 | 1981.9794 (1) |          |
| 73 | H3N3F1A1 | 1951.9729 | 987.4805      |          |
| 74 | H3N4F1   | 1835.9254 | 929.4585      |          |
| 75 | H5N3     | 1824.9095 | 923.9495      |          |
| 76 | H4N3F1   | 1794.8989 | 908.9457      |          |
| 77 | H6N2     | 1783.883  | 903.4346      |          |
| 78 | H3N3A1   | 1777.8837 | 900.4362      |          |
| 79 | H3N4     | 1661.8362 | 842.4131      |          |
| 80 | H4N3     | 1620.8097 | 821.8994      |          |
| 81 | H3N3F1   | 1590.7991 | 806.8941      |          |
| 82 | H5N2     | 1579.7832 | 801.3859      |          |
| 83 | H3N2A1   | 1532.7574 | 777.8726      |          |

|           |               |           |               |
|-----------|---------------|-----------|---------------|
| <b>84</b> | <b>H3N3</b>   | 1416.7099 | 719.8489      |
| <b>85</b> | <b>H4N2</b>   | 1375.6834 | 1375.6831 (1) |
| <b>86</b> | <b>H3N2F1</b> | 1345.6728 | 1345.6725 (1) |
| <b>87</b> | <b>H3N2</b>   | 1171.5836 | 1171.5844 (1) |

---

**Supplementary Table S2** | The monosaccharide compositions of permethylated N-glycans from sample **U2**. The glycans were detected by high mass accuracy ESI-MS. The possible N-glycan composition was determined using the online GlycoMod tool (<http://web.expasy.org/glycomod/>) with the following parameter limits: 1) all returned compositions were assumed to have a core structure of Man<sub>3</sub>GlcNAc<sub>2</sub>, 2) all ions existed as sodium adducts, and 3) the mass error is less than 10 ppm to the theoretical calculation of proposed composition(3). No further verifications were conducted. The number in the parenthesis annotates the charge state of ions. **H** (Hex): hexose; **N** (HexNAc): N-acetyl hexosamine; **F** (Fuc): fucose; **A** (Neu5Ac): N-acetylneuraminic acid.

| Glycans | Monosaccharide composition | Theoretical (1+) | Observed (2+) | Observed (3+)  |
|---------|----------------------------|------------------|---------------|----------------|
| 1       | H13N11F1A1                 | 5953.9813        |               | 1505.7388 (4+) |
| 2       | H12N10A1                   | 5330.666         |               | 1792.2243      |
| 3       | H8N8F6                     | 4707.3397        |               | 1584.4523      |
| 4       | H8N8F5                     | 4533.2505        |               | 1526.4176      |
| 5       | H7N7F5                     | 4084.0244        |               | 1376.6821      |
| 6       | H7N6F4                     | 3664.8448        |               | 1236.9391      |
| 7       | H6N6F4                     | 3460.745         | 1741.8633     | 1168.906       |
| 8       | H6N6F3                     | 3286.6558        | 1654.8181     | 1110.8761      |
| 9       | H6N5F4                     | 3215.6187        |               | 1087.1967      |
| 10      | H6N6F2                     | 3112.5666        | 1567.7749     |                |
| 11      | H5N6F3                     | 3082.556         | 1552.7699     |                |
| 13      | H5N5F4                     | 3011.5189        | 1517.2513     |                |
| 14      | H6N6F1                     | 2938.4774        | 1480.7307     |                |
| 15      | H5N6F2                     | 2908.4668        | 1465.7241     |                |
| 16      | H6N5F2                     | 2867.4403        | 1445.212      |                |
| 18      | H5N5F3                     | 2837.4297        | 1430.2068     |                |
| 20      | H5N4A2                     | 2792.3834        | 1407.6919     |                |
| 21      | H6N6                       | 2764.3882        | 1393.6865     |                |
| 22      | H6N5F1                     | 2693.3511        | 1358.1688     |                |
| 23      | H3N6F3                     | 2674.3564        | 1348.6761     |                |
| 24      | H5N5F2                     | 2663.3405        | 1343.1629     |                |

|    |        |           |           |          |
|----|--------|-----------|-----------|----------|
| 28 | H4N6F1 | 2530.2778 | 1276.6336 |          |
| 29 | H6N5   | 2519.2619 | 1271.1238 |          |
| 30 | H5N5F1 | 2489.2513 | 1256.1191 |          |
| 31 | H4N5F2 | 2459.2407 | 1241.1133 |          |
| 32 | H6N4F1 | 2448.2248 | 1235.6085 |          |
| 33 | H5N4F2 | 2418.2142 | 1220.6005 |          |
| 34 | H9N2   | 2396.1824 | 1209.578  |          |
| 35 | H4N4F3 | 2388.2036 | 1205.6067 | 811.3966 |
| 36 | H3N6F1 | 2326.178  | 1174.586  |          |
| 37 | H4N5F1 | 2285.1515 | 1154.0694 |          |
| 38 | H6N4   | 2274.1356 | 1148.5621 |          |
| 39 | H5N4F1 | 2244.125  | 1133.5562 |          |
| 40 | H4N4F2 | 2214.1144 | 1118.5515 |          |
| 41 | H8N2   | 2192.0826 | 1107.5326 |          |
| 42 | H3N4F3 | 2184.1038 | 1103.5477 |          |
| 43 | H4N5   | 2111.0623 | 1067.0246 |          |
| 44 | H3N5F1 | 2081.0517 | 1052.0195 |          |
| 45 | H5N4   | 2070.0358 | 1046.5121 |          |
| 46 | H4N4F1 | 2040.0252 | 1031.506  |          |
| 47 | H3N4F2 | 2010.0146 | 1016.5012 |          |
| 48 | H5N3F1 | 1998.9987 | 1010.9938 |          |
| 49 | H7N2   | 1987.9828 | 1005.4849 |          |
| 50 | H3N5   | 1906.9625 | 964.9765  |          |
| 51 | H4N4   | 1865.936  | 944.4627  |          |
| 52 | H3N4F1 | 1835.9254 | 929.4564  |          |
| 53 | H6N2   | 1783.883  | 903.4352  |          |
| 54 | H3N3F2 | 1764.8883 | 893.9376  |          |
| 55 | H3N4   | 1661.8362 | 842.4115  |          |
| 56 | H4N3   | 1620.8097 | 821.8983  |          |
| 57 | H3N3F1 | 1590.7991 | 806.8929  |          |
| 58 | H5N2   | 1579.7832 | 801.3851  |          |



|           |               |           |                |
|-----------|---------------|-----------|----------------|
| <b>59</b> | <b>H4N2</b>   | 1375.6834 | 1375.6826      |
| <b>60</b> | <b>H3N2F1</b> | 1345.6728 | 1345.6710 (1+) |
| <b>61</b> | <b>H3N2</b>   | 1171.5836 | 1171.5821      |

---

**Supplementary Table S3** | The monosaccharide compositions of permethylated N-glycans from sample **U3**. The glycans were detected by high mass accuracy ESI-MS. The possible N-glycan composition was determined using the online GlycoMod tool (<http://web.expasy.org/glycomod/>) with the following parameter limits: 1) all returned compositions were assumed to have a core structure of Man<sub>3</sub>GlcNAc<sub>2</sub>, 2) all ions existed as sodium adducts, and 3) the mass error is less than 10 ppm to the theoretical calculation of proposed composition(3). No further verifications were conducted. The number in the parenthesis annotates the charge state of ions. **H** (Hex): hexose; **N** (HexNAc): N-acetyl hexosamine; **F** (Fuc): fucose; **A** (Neu5Ac): N-acetylneuraminic acid.

| Glycans | Monosaccharide composition | Theoretical (1+) | Observed (2+) | Observed (3+) |
|---------|----------------------------|------------------|---------------|---------------|
| 1       | H12N10A1                   | 5330.666         |               | 1792.2294     |
| 2       | H8N8F6                     | 4707.3397        |               | 1584.4523     |
| 3       | H7N7F5                     | 4084.0603        |               | 1376.6918     |
| 4       | H11N6                      | 3784.8872        | 1903.9352     | 1276.9489     |
| 5       | H6N5F1A3                   | 3776.8725        |               | 1274.2952     |
| 6       | H7N6A2                     | 3690.8356        |               | 1245.617      |
| 7       | H6N6F4                     | 3460.745         | 1741.8821     |               |
| 8       | H6N5F1A2                   | 3415.6987        | 1719.359      |               |
| 9       | H6N6F3                     | 3286.6558        | 1654.8354     |               |
| 10      | H5N6F4                     | 3256.6452        | 1639.8211     |               |
| 11      | H6N5F2A1                   | 3228.6141        | 1625.812      |               |
| 12      | H5N5F1A2                   | 3211.5989        | 1617.3088     |               |
| 13      | H6N4F1A2                   | 3170.5724        | 1596.7837     |               |
| 14      | H6N6F2                     | 3112.5666        | 1567.7921     |               |
| 15      | H5N6F3                     | 3082.556         | 1552.7827     |               |
| 16      | H6N5F1A1                   | 3054.5249        | 1538.7705     |               |
| 17      | H5N5F2A1                   | 3024.5143        | 1523.7503     |               |
| 18      | H5N5F4                     | 3011.5189        | 1517.2657     |               |
| 19      | H12N2                      | 3008.4818        | 1515.738      |               |
| 20      | H6N4A2                     | 2996.4832        | 1509.75       | 1014.1637     |
| 21      | H5N4F1A2                   | 2966.4726        | 1494.7438     | 1004.159      |

|    |          |           |           |          |
|----|----------|-----------|-----------|----------|
| 22 | H6N6F1   | 2938.4774 | 1480.7455 | 994.8271 |
| 23 | H5N6F2   | 2908.4668 | 1465.7373 |          |
| 24 | H6N5A1   | 2880.4357 | 1451.7252 | 975.4798 |
| 25 | H6N5F2   | 2867.4403 |           | 971.1467 |
| 26 | H5N5F1A1 | 2850.4251 | 1436.721  |          |
| 27 | H5N5F3   | 2837.4297 |           | 961.1442 |
| 28 | H4N5F2A1 | 2820.4145 | 1421.6994 |          |
| 29 | H5N4A2   | 2792.3834 | 1407.6986 | 946.1288 |
| 30 | H6N6     | 2764.3882 | 1393.6993 |          |
| 31 | H5N6F1   | 2734.3776 | 1378.6849 |          |
| 32 | H6N5F1   | 2693.3511 | 1358.1821 |          |
| 33 | H5N5F2   | 2663.3405 | 1343.176  |          |
| 34 | H4N5F1A1 | 2646.3253 | 1334.67   |          |
| 35 | H4N5F3   | 2633.3299 | 1328.1699 |          |
| 36 | H5N4F1A1 | 2605.2988 | 1314.1556 | 883.7664 |
| 37 | H5N3A2   | 2547.2571 | 1285.1347 | 864.4191 |
| 38 | H6N5     | 2519.2619 | 1271.1357 |          |
| 39 | H5N5F1   | 2489.2513 | 1256.1313 |          |
| 40 | H4N5A1   | 2472.2361 | 1247.6244 |          |
| 41 | H4N5F2   | 2459.2407 | 1241.1263 |          |
| 42 | H5N4A1   | 2431.2096 | 1227.11   | 825.736  |
| 43 | H5N4F2   | 2418.2142 | 1220.6105 |          |
| 44 | H4N4F1A1 | 2401.199  | 1212.0925 |          |
| 45 | H4N4F3   | 2388.2036 | 1205.6073 |          |
| 46 | H4N5F1   | 2285.1515 | 1154.0691 |          |
| 47 | H6N4     | 2274.1356 | 1148.5725 |          |
| 48 | H5N4F1   | 2244.125  | 1133.5675 |          |
| 49 | H4N4F2   | 2214.1144 | 1118.5614 |          |
| 50 | H8N2     | 2192.0826 | 1107.5447 |          |
| 51 | H5N3A1   | 2186.0833 | 1104.5459 |          |
| 52 | H3N4F3   | 2184.1038 | 1103.5467 |          |

|    |        |           |                |
|----|--------|-----------|----------------|
| 53 | H4N5   | 2111.0623 | 1067.0359      |
| 54 | H3N5F1 | 2081.0517 | 1052.0302      |
| 55 | H5N4   | 2070.0358 | 1046.5231      |
| 56 | H4N4F1 | 2040.0252 | 1031.5176      |
| 57 | H3N4F2 | 2010.0146 | 1016.5022      |
| 58 | H7N2   | 1987.9828 | 1009.4959      |
| 59 | H4N4   | 1865.936  | 944.4722       |
| 60 | H3N4F1 | 1835.9254 | 929.4658       |
| 61 | H4N3F1 | 1794.8989 | 908.9522       |
| 62 | H6N2   | 1783.883  | 903.4439       |
| 63 | H3N3A1 | 1777.8837 | 900.444        |
| 64 | H3N3F2 | 1764.8883 | 1764.888 (1+)  |
| 65 | H3N4   | 1661.8362 | 842.42         |
| 66 | H4N3   | 1620.8097 | 821.9062       |
| 67 | H3N3F1 | 1590.7991 | 806.9007       |
| 68 | H5N2   | 1579.7832 | 801.3928       |
| 69 | H4N2   | 1375.6834 | 1375.6828 (1+) |
| 70 | H3N2F1 | 1345.6728 | 1345.6715 (1+) |
| 71 | H3N2   | 1171.5836 | 1171.5824 (1+) |

---

**Supplementary Table S4** | A summary of the urinary proteins co-identified in both **+PNGase F** and **Control** aliquots (**Supplementary Fig. S6**). The urinary proteins were divided into two distinct groups, glycoproteins and other proteins. Glycoproteins were defined as proteins being identified by at least one deglycopeptide from **+PNGase F** aliquots. Other proteins were defined as protein identified without any deglycopeptides. The unique peptide count for every co-identified protein was calculated and averaged into two groups: glycoproteins and other proteins. Approximately 2 or more additional unique peptides per protein were identified for the glycoproteins due to the effect of upfront de-N-glycosylation. There was no increase in unique peptides for other proteins after de-N-glycosylation.

| Urine Sample | Co-identified proteins | Co-identified proteins |                | Ave. unique peptide count<br>( + PNGase F vs. Control ) |                |
|--------------|------------------------|------------------------|----------------|---------------------------------------------------------|----------------|
|              |                        | Glycoproteins          | Other proteins | Glycoproteins                                           | Other proteins |
| <b>U1</b>    | 846                    | 250                    | 596            | 12.7 vs. 10.2                                           | 5.6 vs. 5.3    |
| <b>U2</b>    | 880                    | 272                    | 608            | 11.0 vs. 9.5                                            | 5.4 vs. 5.6    |
| <b>U3</b>    | 966                    | 310                    | 656            | 11.6 vs. 9.8                                            | 5.6 vs. 5.6    |
| <b>Total</b> | 2692                   | 832                    | 1860           | 11.7 vs. 9.8                                            | 5.5 vs. 5.5    |

**Supplementary Table S5** | The complete list of non-redundant N-glycosites (865), spanning in 458 glycoproteins, identified in three urine samples (**U1**, **U2** and **U3**). G: the site was detected as the deglycosylated form only (<sup>18</sup>O-incorporated aspartic acid); N: the glycosite was detected as the non-glycosylated form only (asparagine); P: the glycosite was detected as both the non-glycosylated and deglycosylated forms; (-): the glycosite was not detected. Glycosites reported and annotated in the database UniProtKB (<http://www.uniprot.org/>) are annotated as (+). Those which have never been confirmed as glycosylated in UniProtKB are annotated as (-). A glycosite was considered as partially occupied (**PO**) as long as its non-glycosylated form (asparagine) was detected in any sample.

| Gene name | Accession # | Glycosite # | Consensus Sequence | UniProt Status | U1 | U2 | U3 |
|-----------|-------------|-------------|--------------------|----------------|----|----|----|
| 1A03      | P01893      | 110         | YNQSE              | +              | G  | -  | -  |
| 4F2       | P08195      | 365         | QNITK              | +              | -  | -  | G  |
| 4F2       | P08195      | 424         | LNATG              | +              | G  | -  | G  |
| A1AG1     | P02763      | 72          | PNKTE              | +              | P  | G  | P  |
| A1AG1     | P02763      | 93          | YNTTY              | +              | G  | G  | P  |
| A1AG2     | P19652      | 93          | YNSSY              | +              | P  | G  | P  |
| A1AT      | P01009      | 107         | FNLTE              | +              | P  | -  | -  |
| A1BG      | P04217      | 179         | GNYSY              | +              | G  | -  | G  |
| A2GL      | P02750      | 186         | ANFTL              | +              | P  | -  | G  |
| A2GL      | P02750      | 269         | SNNSL              | +              | P  | -  | -  |
| A2GL      | P02750      | 325         | QNDTR              | +              | G  | G  | -  |
| AACT      | P01011      | 106         | FNLTE              | +              | P  | -  | P  |
| AACT      | P01011      | 127         | LNQSS              | +              | -  | -  | G  |
| ABP1      | P19801      | 538         | ENITN              | +              | -  | G  | -  |
| ACAM      | Q9H6B4      | 74          | NNLTE              | -              | -  | G  | G  |
| ACE       | P12821      | 111         | QNFTD              | +              | -  | G  | G  |
| ACE       | P12821      | 445         | TNDTE              | +              | -  | G  | -  |
| ACE       | P12821      | 509         | RNETH              | +              | -  | G  | G  |
| ACE       | P12821      | 695         | ANHTL              | +              | G  | -  | -  |
| ACE       | P12821      | 714         | QNTTI              | +              | -  | G  | -  |
| ACE2      | Q9BYF1      | 103         | QNGSS              | +              | -  | G  | G  |
| ACE2      | Q9BYF1      | 546         | SNSTE              | +              | G  | G  | G  |
| ACE2      | Q9BYF1      | 690         | KNVSD              | -              | -  | -  | G  |

|       |        |     |       |   |   |   |   |
|-------|--------|-----|-------|---|---|---|---|
| ADAM9 | Q13443 | 125 | HNSI  | - | - | - | G |
| ADAM9 | Q13443 | 144 | ENASY | - | - | - | G |
| ADAM9 | Q13443 | 154 | QNSSH | - | - | - | G |
| AFAM  | P43652 | 33  | FNSTQ | + | - | - | G |
| AFAM  | P43652 | 402 | FNETT | + | - | G | G |
| AGAL  | P06280 | 139 | GNKTC | + | - | G | G |
| AGAL  | P06280 | 192 | LNRTG | + | G | - | - |
| AGRIN | O00468 | 932 | ANATK | - | - | - | G |
| AMBP  | P02760 | 250 | YNGTS | + | P | G | P |
| AMPE  | Q07075 | 324 | ANITK | + | G | - | G |
| AMPE  | Q07075 | 589 | DNITS | - | - | G | G |
| AMPE  | Q07075 | 597 | FNRSE | - | - | G | G |
| AMPE  | Q07075 | 607 | LNSSN | + | G | G | G |
| AMPE  | Q07075 | 828 | KNVTL | - | - | G | - |
| AMPN  | P15144 | 128 | LNRTL | + | N | G | G |
| AMPN  | P15144 | 234 | FNITL | + | G | G | G |
| AMPN  | P15144 | 265 | WNVTE | + | G | G | G |
| AMPN  | P15144 | 681 | LNNTL | + | G | - | - |
| AMPN  | P15144 | 735 | RNNTN | - | G | - | - |
| AMPN  | P15144 | 818 | RNATL | + | G | G | G |
| AMY1  | P04745 | 476 | GNCTG | - | P | P | P |
| ANAG  | P54802 | 261 | VNVTK | - | G | - | - |
| ANAG  | P54802 | 503 | YNCSG | - | G | G | G |
| ANGT  | P01019 | 47  | HNEST | + | G | - | G |
| ANPRC | P17342 | 394 | WNRTF | + | G | - | G |
| ANT3  | P01008 | 128 | CNDTL | + | G | G | - |
| ANT3  | P01008 | 187 | FNETY | + | G | G | G |
| ANT3  | P01008 | 224 | SNKTE | + | G | G | G |
| ANTR1 | Q9H6X2 | 184 | FNETQ | + | G | G | - |
| ANTR1 | Q9H6X2 | 262 | INDSV | - | - | - | G |
| APLP2 | Q06481 | 541 | RNQLS | - | G | - | - |

|       |        |      |       |   |   |   |   |
|-------|--------|------|-------|---|---|---|---|
| APOA  | P08519 | 61   | HNRTT | - | G | - | G |
| APOD  | P05090 | 65   | ANYSL | + | P | G | P |
| APOD  | P05090 | 98   | VNLTE | + | G | G | G |
| APOF  | Q13790 | 118  | VNATQ | - | G | - | - |
| APOH  | P02749 | 162  | GNNSL | + | G | G | G |
| APOH  | P02749 | 253  | GNWSA | + | P | G | G |
| APOM  | O95445 | 135  | LNETG | + | - | G | - |
| ASAH1 | Q13510 | 259  | ENSTS | + | G | G | - |
| ASAH1 | Q13510 | 286  | GNQSG | + | N | G | G |
| ASGR2 | P07307 | 170  | SNGSQ | + | G | G | G |
| ASM3A | Q92484 | 222  | LNKTD | + | G | - | - |
| ASM3A | Q92484 | 238  | LNNSQ | - | - | G | - |
| ASPG  | P20933 | 38   | KNATE | + | - | G | G |
| ATRN  | O75882 | 264  | SNSSD | + | - | G | G |
| ATRN  | O75882 | 300  | CNSSD | + | - | G | G |
| ATRN  | O75882 | 325  | ANQSF | - | - | G | G |
| ATRN  | O75882 | 416  | GNVTN | + | G | G | G |
| ATRN  | O75882 | 428  | HNESW | + | G | - | G |
| ATRN  | O75882 | 575  | HNDTS | + | G | - | - |
| ATRN  | O75882 | 731  | RNHSC | + | P | G | P |
| ATRN  | O75882 | 914  | LNGSV | - | G | G | G |
| ATRN  | O75882 | 923  | ANHSA | - | G | G | G |
| ATRN  | O75882 | 1043 | LNSSM | + | - | G | G |
| ATRN  | O75882 | 1054 | YNWSF | - | G | G | G |
| ATRN  | O75882 | 1073 | INQSI | - | N | G | - |
| ATRN  | O75882 | 1082 | ENLTT | - | P | G | G |
| ATRN  | O75882 | 1198 | INASK | + | N | P | P |
| AVR2B | Q13705 | 42   | TNQSG | - | - | G | - |
| B3GN1 | O43505 | 204  | TNVSY | - | G | - | G |
| B3GN2 | Q9NY97 | 79   | TNQTG | + | - | G | G |
| B3GN2 | Q9NY97 | 89   | SNISH | - | G | G | - |



|       |         |     |       |   |   |   |   |
|-------|---------|-----|-------|---|---|---|---|
| B3GN2 | Q9NY97  | 127 | RNYSL | - | - | G | - |
| B3GN2 | Q9NY97  | 173 | GNQTV | - | - | G | - |
| BAMBI | Q13145  | 87  | RNHSG | - | - | G | G |
| BASI  | P35613  | 160 | LNDSA | + | G | G | G |
| BCAM  | P50895  | 377 | LNSSA | - | G | G | G |
| BCAM  | P508965 | 383 | VNCSV | - | G | G | G |
| BCAM  | P50895  | 439 | QNFTL | + | - | G | G |
| BGAL  | P16278  | 247 | SNITD | - | - | - | G |
| BGAL  | P16278  | 464 | LNITG | + | G | G | G |
| BGLR  | P08236  | 272 | ANGTG | + | P | N | N |
| BMPR2 | Q13873  | 55  | ENGTI | - | G | G | - |
| BST1  | Q10588  | 66  | KNCTA | - | - | G | G |
| BST2  | Q10589  | 65  | RNVTH | + | G | G | G |
| BT2A1 | Q7KYR7  | 114 | HNITA | + | P | P | P |
| BT2A1 | Q7KYR7  | 120 | ENGTY | + | P | P | P |
| BTD   | P43251  | 119 | FNFTR | + | G | G | G |
| BTD   | P43251  | 150 | FNDTE | + | G | G | G |
| BTD   | P43251  | 203 | NNGTL | + | - | - | G |
| BTD   | P43251  | 349 | ENATG | + | G | G | G |
| BTD   | P43251  | 402 | DNFTL | + | G | - | - |
| C163A | Q86VB7  | 105 | ANSSA | + | - | G | G |
| C163A | Q86VB7  | 123 | GNESA | - | - | G | G |
| C163A | Q86VB7  | 140 | SNCTH | + | - | G | G |
| C1RL  | Q9NZP8  | 147 | ENKTA | + | G | - | G |
| C1RL  | Q9NZP8  | 166 | VNYSQ | + | - | - | G |
| C1RL  | Q9NZP8  | 242 | QNQTT | + | - | G | G |
| C1RL  | Q9NZP8  | 296 | KNQSV | + | G | G | G |
| C1RL  | Q9NZP8  | 331 | QNESH | - | G | - | - |
| C1RL  | Q9NZP8  | 335 | HNFSG | - | G | - | - |
| C1RL  | Q9NZP8  | 363 | DNETL | - | G | - | - |
| CA159 | Q96HA4  | 104 | NGTTL | - | - | - | G |

|       |         |     |        |   |   |   |   |
|-------|---------|-----|--------|---|---|---|---|
| CA159 | Q96HA4  | 111 | YNGSE  | - | - | - | G |
| CA2D1 | P54289  | 824 | ENFTK  | - | - | G | - |
| CA2D1 | P54289  | 888 | VNISV  | - | - | - | G |
| CA2D1 | P54289  | 895 | FNKSY  | - | - | - | G |
| CAD11 | P55287  | 540 | PNFTV  | - | G | - | - |
| CAD13 | P55290  | 52  | LNLTF  | - | G | - | G |
| CAD13 | P55290  | 500 | VNATD  | + | - | G | - |
| CAD13 | P55290  | 638 | INNTH  | + | G | - | - |
| CAD15 | P55291  | 531 | RNWSL  | - | - | - | G |
| CAD15 | P552921 | 538 | VNVSH  | - | - | - | G |
| CADH2 | P19022  | 325 | NNETG  | - | - | - | G |
| CADH2 | P19022  | 402 | ANLTV  | + | G | - | - |
| CADH2 | P19022  | 692 | SNISI  | + | P | G | - |
| CADH6 | P55285  | 455 | HNITV  | - | G | - | - |
| CADM1 | Q9BY67  | 67  | VNKSD  | - | G | G | G |
| CADM1 | Q9BY67  | 101 | LNFS   | + | G | G | G |
| CADM1 | Q9BY67  | 113 | TNVS   | + | G | G | G |
| CADM1 | Q9BY67  | 165 | VNCTA  | - | - | G | - |
| CADM1 | Q9BY67  | 304 | LNKTD  | + | G | P | P |
| CADM1 | Q9BY67  | 308 | DNGTYR | - | - | G | - |
| CADM2 | Q8N3J6  | 51  | DNTSL  | - | - | - | G |
| CADM2 | Q8N3J6  | 287 | LNKTD  | - | - | - | G |
| CADM3 | Q8N126  | 290 | LNKSD  | + | - | - | G |
| CADM4 | Q8NFZ8  | 67  | FNGTR  | - | G | G | G |
| CADM4 | Q8NFZ8  | 262 | GNESL  | - | G | P | P |
| CADM4 | Q8NFZ8  | 286 | DNGTY  | - | - | G | G |
| CADM4 | Q8NFZ8  | 375 | LNGSD  | - | - | G | - |
| CAP7  | P20160  | 171 | VNVTV  | + | - | G | - |
| CATB  | P07858  | 38  | RNTTW  | - | - | - | G |
| CATC  | P53634  | 53  | VNCSV  | + | G | - | G |
| CATC  | P53634  | 119 | CNETM  | + | G | G | G |

|       |        |     |       |   |   |   |   |
|-------|--------|-----|-------|---|---|---|---|
| CATH  | P09668 | 101 | QNCSA | + | - | G | G |
| CATL1 | P07711 | 221 | ANDTG | + | G | G | G |
| CATZ  | Q9UBR2 | 184 | RNYTL | + | - | G | - |
| CBG   | P08185 | 96  | FNLTE | + | P | G | G |
| CBPB2 | Q96IY4 | 73  | VNASD | + | G | G | G |
| CBPE  | P16870 | 139 | GNETI | - | N | G | N |
| CBPE  | P16870 | 390 | ANATI | - | - | G | G |
| CBPM  | P14384 | 38  | QNYSS | + | G | G | G |
| CBPM  | P14384 | 115 | INSTR | + | G | - | - |
| CBPM  | P14384 | 164 | NNVSR | + | - | G | G |
| CBPM  | P14384 | 384 | QNFSA | - | - | N | G |
| CBPZ  | Q66K79 | 57  | YNHTT | - | G | G | G |
| CD14  | P08571 | 151 | RNVSW | + | P | G | P |
| CD14  | P08571 | 282 | LNLSF | + | P | - | G |
| CD177 | Q8N6Q3 | 46  | KNTSC | - | - | - | G |
| CD177 | Q8N6Q3 | 189 | LNGTQ | - | - | G | - |
| CD177 | Q8N6Q3 | 382 | LNHTR | - | - | - | G |
| CD27  | P26842 | 95  | RNCTI | - | G | G | G |
| CD276 | Q5ZPR3 | 91  | ANRTA | - | G | G | G |
| CD276 | Q5ZPR3 | 104 | GNASL | - | G | - | G |
| CD276 | Q5ZPR3 | 215 | ANGTY | - | G | G | G |
| CD276 | Q5ZPR3 | 309 | ANRTA | - | - | G | - |
| CD33  | P20138 | 100 | NNCSL | - | G | G | G |
| CD34  | P28906 | 194 | QNKTS | - | G | - | - |
| CD34  | P28906 | 194 | QNKTS | - | - | G | - |
| CD44  | P16070 | 57  | FNSTL | + | P | G | G |
| CD47  | Q08722 | 73  | LNKST | + | - | G | - |
| CD47  | Q08722 | 111 | GNYTC | + | - | G | - |
| CD59  | P13987 | 43  | VNCSS | + | G | G | P |
| CD63  | P08962 | 130 | NNHTA | + | G | G | G |
| CD63  | P08962 | 150 | ANYTD | - | - | G | - |

|       |        |      |       |   |   |   |   |
|-------|--------|------|-------|---|---|---|---|
| CD68  | P34810 | 199  | PNKTK | + | - | G | - |
| CD7   | P09564 | 96   | DNLTI | + | P | G | G |
| CD83  | Q01151 | 96   | RNTTS | - | - | G | G |
| CD97  | P48960 | 33   | QNSSC | - | - | G | G |
| CD97  | P48960 | 38   | VNATA | - | - | G | G |
| CD97  | P48960 | 108  | KNESE | - | - | - | G |
| CDHR2 | Q9BYE9 | 632  | HNFSL | - | G | - | - |
| CDHR5 | Q9HBB8 | 81   | LVNTP | + | G | G | G |
| CDHR5 | Q9HBB8 | 140  | VNSTV | - | - | G | G |
| CDHR5 | Q9HBB8 | 297  | VNGTF | - | - | G | - |
| CDHR5 | Q9HBB8 | 308  | GNLTV | + | - | G | - |
| CEAM6 | P40199 | 197  | GNMTL | + | G | - | G |
| CERU  | P00450 | 138  | DNTTD | + | G | G | G |
| CERU  | P00450 | 358  | CNKSS | + | P | - | G |
| CERU  | P00450 | 397  | ENLTA | + | G | G | G |
| CERU  | P00450 | 762  | QNVSN | + | G | G | P |
| CETP  | P11597 | 257  | KNVSE | + | - | - | G |
| CETP  | P11597 | 358  | VNSSV | + | - | - | P |
| CF072 | Q9NU53 | 46   | INVTT | - | G | G | G |
| CF072 | Q9NU53 | 166  | SNYTL | - | - | - | G |
| CFAH  | P08603 | 882  | INSSR | + | G | - | - |
| CFAH  | P08603 | 911  | ENETT | + | - | - | G |
| CFAI  | P05156 | 70   | KNGTA | + | - | G | - |
| CFAI  | P05156 | 103  | NNGTC | + | G | - | G |
| CHL1  | O00533 | 87   | SNSNG | - | G | - | - |
| CHL1  | O00533 | 562  | INGTE | + | - | - | G |
| CHL1  | O00533 | 767  | TNHTL | + | G | - | G |
| CHL1  | O00533 | 1026 | VNLTQ | + | - | - | G |
| CLC14 | Q86T13 | 189  | SNLSY | - | P | - | G |
| CLC4G | Q6UXB4 | 159  | QNNSC | - | - | - | G |
| CLN5  | O75503 | 203  | DNETG | - | - | G | - |

|       |        |      |       |   |   |   |   |
|-------|--------|------|-------|---|---|---|---|
| CLN5  | O75503 | 352  | RNKTL | - | G | - | - |
| CLUL1 | Q15846 | 311  | QNLSR | - | - | G | - |
| CLUS  | P10909 | 86   | LNETR | + | - | G | G |
| CLUS  | P10909 | 103  | CNETM | + | G | G | G |
| CLUS  | P10909 | 145  | LNQSS | + | G | - | G |
| CLUS  | P10909 | 354  | LNTSS | + | P | - | - |
| CLUS  | P10909 | 374  | ANLTQ | + | G | G | G |
| CNTN1 | Q12860 | 208  | GNYSK | - | - | - | G |
| CNTN1 | Q12860 | 494  | ANSTG | + | - | G | G |
| CO3   | P01034 | 85   | GNVTF | + | G | G | G |
| CO4A  | P0C0L4 | 1328 | LVNVL | + | G | G | G |
| CO5A3 | P25940 | 102  | ANQSV | + | - | G | G |
| CO5A3 | P25940 | 141  | VNLTD | + | G | - | - |
| CO6A1 | P12109 | 212  | RNFTA | + | G | G | G |
| CO6A1 | P12109 | 804  | KNVTA | + | G | G | G |
| CO6A1 | P12109 | 896  | QNYTA | + | G | - | - |
| CO6A3 | P12111 | 3037 | QNLTV | - | G | G | - |
| CO7   | P10643 | 754  | RNYTL | + | G | G | G |
| COCH  | O43405 | 100  | ENYSS | - | - | G | G |
| COMP  | P49747 | 121  | GNGSH | - | - | G | G |
| CPN2  | P22792 | 74   | PNLTK | - | N | G | N |
| CPN2  | P22792 | 348  | NNLTA | + | - | G | G |
| CPN2  | P22792 | 359  | QNLSK | + | - | G | G |
| CPVL  | Q9H3G5 | 81   | VNKTY | + | G | G | - |
| CPVL  | Q9H3G5 | 307  | QNVTV | - | G | G | G |
| CPVL  | Q9H3G5 | 346  | GNQTF | + | - | P | - |
| CR1   | P17927 | 447  | VNYTC | - | - | G | - |
| CR3L3 | Q68CJ9 | 427  | RNATE | + | G | - | G |
| CREG1 | O75639 | 160  | VNETE | + | - | - | G |
| CREL1 | Q96HD1 | 205  | RNASH | - | - | - | G |
| CRIM1 | Q9NZV1 | 71   | RNESC | - | - | G | - |

|       |        |      |       |   |   |   |   |
|-------|--------|------|-------|---|---|---|---|
| CRUM2 | Q5IJ48 | 786  | DNSSQ | - | - | G | G |
| CSF1  | P09603 | 154  | FNETK | - | G | G | G |
| CSF1  | P09603 | 172  | CNNSF | - | - | - | G |
| CSF1R | P07333 | 153  | TNYSF | - | G | - | - |
| CSPG2 | P13611 | 1442 | QNFSO | - | - | G | - |
| CSPG4 | Q6UVK1 | 348  | TNASL | - | G | G | G |
| CTL2  | Q8IWA5 | 200  | KNITD | + | G | G | G |
| CTL2  | Q8IWA5 | 417  | SNESR | - | - | G | G |
| CTL4  | Q53GD3 | 69   | RNSTG | - | - | G | G |
| CTL4  | Q53GD3 | 405  | INTSC | - | - | G | G |
| CTL4  | Q53GD3 | 416  | VNSSC | - | - | G | G |
| CUBN  | O60494 | 105  | QNISS | - | G | G | G |
| CUBN  | O60494 | 711  | GNYTD | - | - | G | G |
| CUBN  | O60494 | 781  | GNGTI | - | G | G | G |
| CUBN  | O60494 | 1802 | GNATG | - | G | G | G |
| CUBN  | O60494 | 2085 | FNASF | - | G | - | G |
| CUBN  | O60494 | 2400 | DNHTS | - | - | G | G |
| CUBN  | O60494 | 2531 | VNVSN | - | - | G | G |
| CUBN  | O60494 | 2923 | SNFTG | - | G | G | G |
| CUBN  | O60494 | 3103 | ANTSD | - | G | - | - |
| CUBN  | O60494 | 3125 | SNNSM | - | G | P | P |
| CUBN  | O60494 | 3357 | RNASA | - | G | - | - |
| CUBN  | O60494 | 3457 | RNGSN | - | G | G | G |
| CXL16 | Q9H2A7 | 168  | PNETT | - | - | G | G |
| CYTM  | Q15828 | 137  | QNSSQ | - | P | - | P |
| DAF   | P08174 | 95   | CNRSC | + | G | P | G |
| DAG1  | Q14118 | 141  | ANGSH | - | G | - | G |
| DIAC  | Q01459 | 299  | INSSI | + | P | G | G |
| DKK3  | Q9UBP4 | 106  | GNNTI | - | - | - | G |
| DMB   | P28068 | 110  | TNRTR | + | G | - | - |
| DNAS1 | P24855 | 128  | GNDTF | - | G | G | G |

|       |        |     |       |   |   |   |   |
|-------|--------|-----|-------|---|---|---|---|
| DNER  | Q8NFT8 | 223 | QNTSV | + | - | - | G |
| DNER  | Q8NFT8 | 361 | NNASC | - | - | G | G |
| DPEP1 | P16444 | 57  | ANLTT | + | G | G | G |
| DPEP1 | P16444 | 279 | ANLSQ | + | G | G | G |
| DPEP1 | P16444 | 332 | RNWTE | + | G | G | G |
| DPEP1 | P16444 | 358 | SNLTQ | - | - | N | G |
| DPP2  | Q9UHL4 | 315 | YNASG | + | - | G | G |
| DPP4  | P27487 | 150 | PNNTQ | + | - | G | G |
| DPP4  | P27487 | 520 | LNETK | + | - | P | G |
| DSC2  | Q02487 | 392 | ANYTI | + | G | G | G |
| DSC2  | Q02487 | 546 | YNITV | + | - | - | G |
| DSC2  | Q02487 | 629 | INDTA | + | - | G | G |
| DSG2  | Q14126 | 182 | INATD | + | - | G | G |
| EFNA1 | P20827 | 26  | WNSSN | - | G | G | G |
| EFNA2 | O43921 | 42  | WNRSN | - | - | - | G |
| EFNA4 | P52798 | 33  | WNSSN | - | G | - | - |
| EFNA5 | P52803 | 37  | WNSSN | + | G | - | - |
| EFNB1 | P98172 | 139 | SNGSL | - | G | G | G |
| EGF   | P01133 | 104 | LNGSR | - | G | G | - |
| EGF   | P01133 | 148 | GNNSH | - | G | G | G |
| EGF   | P01133 | 324 | GNCSS | - | P | G | P |
| EGF   | P01133 | 404 | RNVSE | - | - | P | G |
| EGF   | P01133 | 596 | ENISQ | - | P | P | - |
| EGF   | P01133 | 815 | DNITE | - | - | G | G |
| EGF   | P01133 | 926 | ENASC | - | - | G | - |
| EMR2  | Q9UHX3 | 41  | VNATA | - | - | - | G |
| ENPP2 | Q13822 | 525 | NNGTH | - | G | - | - |
| ENPP7 | Q6UWV6 | 100 | YNTTS | + | G | - | - |
| EPCR  | Q9UNN8 | 47  | GNASL | - | G | - | - |
| EPCR  | Q9UNN8 | 64  | TNTTI | + | G |   |   |
| EPCR  | Q9UNN8 | 136 | VNGSS | + | G | - | - |

|       |        |      |       |   |   |   |   |
|-------|--------|------|-------|---|---|---|---|
| EPCR  | Q9UNN8 | 172  | YNRTR | + | P | - | - |
| EPHA1 | P21709 | 338  | RNLSF | - | - | - | G |
| EPHB2 | P29323 | 265  | ENGTV | - | - | G | G |
| EPHB2 | P29323 | 482  | YNATA | - | - | G | G |
| EPHB3 | P54753 | 445  | VNITT | - | - | G | G |
| EPHB4 | P54760 | 203  | VNLTR | - | G | - | N |
| EPHB4 | P54760 | 335  | LNGSS | - | - | - | G |
| ERBB4 | Q15303 | 576  | DNCTK | + | - | G | G |
| ESAM  | Q96AP7 | 169  | ANVTL | + | G | - | G |
| ESAM  | Q96AP7 | 213  | TNLSS | - | P | - | P |
| FA12  | P00748 | 433  | RNHSC | + | - | G | G |
| FA5   | P12259 | 821  | LNSST | + | - | G | - |
| FAM3B | P58499 | 120  | GNVTA | - | G | - | - |
| FAT4  | Q6V0I7 | 615  | DNGTV | - | - | G | - |
| FAT4  | Q6V0I7 | 1225 | ANLTQ | - | - | G | G |
| FBLN1 | P23142 | 98   | DNASL | - | G | G | - |
| FBLN2 | P98095 | 180  | GNFSD | - | G | G | G |
| FBLN4 | O95967 | 198  | NNRSC | - | - | G | - |
| FBLN5 | Q9UBX5 | 296  | RNHTC | - | G | G | G |
| FBN1  | P35555 | 1581 | VNTSE | + | - | G | G |
| FBN1  | P35555 | 1703 | DNQTC | - | G | G | G |
| FBN1  | P35555 | 1713 | FNMTK | - | G | G | G |
| FBN1  | P35555 | 2077 | RNHSK | - | G | - | - |
| FBN1  | P35555 | 2178 | GNGTC | - | - | - | G |
| FBN1  | P35555 | 2734 | TNETD | - | G | - | G |
| FBN1  | P35555 | 2750 | ANVSL | - | G |   | G |
| FBN1  | P35555 | 2767 | FNISH | - | G | G | G |
| FCERA | P12319 | 46   | ENVTL | + | - | - | G |
| FCGBP | Q9Y6R7 | 1830 | PNGTL | - | - | - | G |
| FETUA | P02765 | 156  | LNDTR | + | G | G | G |
| FETUA | P02765 | 176  | NNGSN | + | G | G | G |



|       |        |      |       |   |   |   |   |
|-------|--------|------|-------|---|---|---|---|
| FGFR1 | P11362 | 77   | SNRTR | - | G | - | - |
| FGFR1 | P11362 | 296  | VNGSK | + | - | G | - |
| FGFR1 | P11362 | 317  | VNTTD | - | - | - | G |
| FGFR2 | P21802 | 83   | NNRTV | - | G | - | G |
| FGL2  | Q14314 | 263  | TNFTR | - | - | G | G |
| FGL2  | Q14314 | 336  | YNGTA | + | G | G | G |
| FHR1  | Q03591 | 126  | NNISC | + | N | N | P |
| FHR2  | P36980 | 126  | NNISC | + | N | N | P |
| FIBA  | P02671 | 686  | FNRTW | + | G | G | G |
| FIBG  | P02679 | 78   | ENKTS | + | - | G | - |
| FINC  | P03751 | 528  | VNDTF | + | - | G | G |
| FINC  | P03751 | 542  | LNCTC | + | G | G | G |
| FOLR1 | P15328 | 69   | TNTSQ | - | G | G | G |
| FOLR1 | P15328 | 161  | WNWTS | + | P | G | N |
| FREM2 | Q5SZK8 | 2121 | INDSV | - | - | G | - |
| FSTL1 | Q12841 | 144  | SNYSE | - | - | - | G |
| FZD4  | Q9ULV1 | 59   | YNVTK | - | G | G | G |
| FZD4  | Q9ULV1 | 144  | LNCSK | - | G | G | G |
| GALNS | P34059 | 423  | QNVSG | + | G | - | G |
| GAS1  | P54826 | 117  | LNHTR | - | - | - | G |
| GGT1  | P19440 | 120  | FNSSE | + | - | G | G |
| GGT1  | P19440 | 344  | RNMTS | + | - | G | G |
| GGT1  | P19440 | 511  | PNVTT | + | G | G | G |
| GGTL1 | Q9BX51 | 167  | PNVTT | - | G | G | G |
| GLCM  | P04062 | 185  | HNFSL | + | - | G | - |
| GLCM  | P04062 | 309  | ANSTH | + | G | - | - |
| GLHA  | P01315 | 76   | KNVTS | + | - | G | G |
| GLHA  | P01315 | 102  | ENHTA | + | - | - | G |
| GLTL4 | Q6P9A3 | 320  | ENSTA | - | - | - | G |
| GNS   | P15586 | 111  | VNNTL | - | G | - | G |
| GNS   | P15586 | 117  | GNCSS | - | G | - | G |

|       |         |     |       |   |   |   |   |
|-------|---------|-----|-------|---|---|---|---|
| GNS   | P15586  | 279 | TNSSI | + | - | G | G |
| GNS   | P15586  | 405 | SNLTW | - | G | G | G |
| GOLM1 | Q8NBJ4  | 109 | NNITT | + | G | G | G |
| GOLM1 | Q8NBJ4  | 144 | KNQTN | - | - | - | G |
| GP116 | Q8IZF2  | 256 | LNQTY | + | G | G | G |
| GP116 | Q8IZF2  | 301 | SNVSW | - | G | - | G |
| GP116 | Q8IZF2  | 315 | QNSSR | + | - | G | G |
| GP116 | Q8IZF2  | 627 | FNASS | - | - | G | - |
| GP116 | Q8IZF2  | 649 | ANNSV | - | G | - | - |
| GP116 | Q8IZF2  | 666 | ENITC | - | - | - | G |
| GP126 | Q86SQ4  | 818 | WNTSG | - | - | - | G |
| GP2   | P55259  | 216 | LNSSD | - | - | G | - |
| GPC1  | P35052  | 79  | ANRSH | - | - | - | G |
| GPC1  | P35052  | 116 | LNDSE | - | - | - | G |
| GPC3  | P51654  | 241 | INTTD | - | G | - | - |
| GPR56 | Q9Y653  | 303 | KNSSQ | - | - | G | - |
| GPR56 | Q9Y653  | 324 | ANLTE | - | G | G | - |
| GPR64 | Q8IZP9  | 194 | LNNTM | - | - | G | - |
| GPV   | P40197  | 181 | NNLTH | + | G | - | - |
| GRN   | P28799  | 236 | PNATC | - | G | G | G |
| GRN   | P28799  | 265 | ENATT | + | G | G | G |
| GRN   | P28799  | 530 | DNQTC | - | - | G | - |
| GSLG1 | Q92896  | 165 | LNLTT | - | - | - | G |
| H6ST2 | Q96MM7  | 460 | YNTTR | - | G | - | - |
| HAVR2 | Q8TDQ0  | 99  | ENVTL | - | - | - | G |
| HECA2 | A8MNVW5 | 201 | KNGRP | - | G | - | G |
| HEG1  | Q9ULI3  | 159 | ENLTL | + | G | G | G |
| HEG1  | Q9ULI3  | 279 | RNSSG | - | G | - | G |
| HEG1  | Q9ULI3  | 314 | LNNST | - | G | G | G |
| HEG1  | Q9ULI3  | 520 | LNSSA | + | - | P | P |
| HEMO  | P02790  | 187 | GNCSS | + | P | G | G |

|       |        |      |       |   |   |   |   |
|-------|--------|------|-------|---|---|---|---|
| HEMO  | P02790 | 240  | RNGTG | + | G | G | G |
| HEMO  | P02790 | 246  | GNSTH | + | G | G | G |
| HEMO  | P02790 | 453  | QNVTS | + | P | G | G |
| HEP2  | P05546 | 49   | KNLSM | + | G | - | G |
| HEXA  | P06865 | 157  | INKTE | + | - | - | G |
| HG2A  | P04233 | 136  | GNMTE | + | - | - | G |
| HG2A  | P04233 | 270  | HNCSE | - | - | - | G |
| HGFA  | Q04756 | 290  | GNGTG | - | G | G | G |
| HMCN2 | Q8NDA2 | 2468 | CNVTG | - | G | G | G |
| HMCN2 | Q8NDA2 | 2507 | ANLSS | - | G | - | - |
| HPT   | P00738 | 184  | HNLTT | + | P | - | - |
| HPTR  | P00739 | 126  | HNLTT | - | P | - | - |
| HPTR  | P00739 | 149  | LNHSE | - | - | G | - |
| HRG   | P04196 | 344  | NNSSD | + | G | - | - |
| HYOU1 | Q9Y4L1 | 830  | LNHSS | + | G | - | G |
| HYOU1 | Q9Y4L1 | 862  | INETW | + | - | G | - |
| HYOU1 | Q9Y4L1 | 931  | LNASA | + | - | G | - |
| I10R2 | Q08334 | 49   | GNLTF | - | G | - | G |
| I13R1 | P78552 | 105  | TNESE | - | - | - | P |
| I18BP | O95998 | 79   | LNGTL | - | G | - | G |
| I18BP | O95998 | 147  | TNFSC | - | P | G | G |
| IBP3  | P17936 | 116  | VNASA | + | G | G | G |
| IC1   | P05155 | 25   | PNATS | + | G | - | - |
| IC1   | P05155 | 69   | TNSTT | + | G | G | G |
| IC1   | P05155 | 238  | VNASR | + | G | - | G |
| IC1   | P05155 | 253  | SNNSD | + | G | P | P |
| ICAM1 | P05362 | 145  | ANLTV | + | G | G | G |
| ICAM1 | P05362 | 267  | GNDSF | + | - | G | G |
| ICAM2 | P13598 | 47   | VNCST | + | - | G | - |
| ICAM2 | P13598 | 82   | SNISH | + | G | - | G |
| ICAM2 | P13598 | 105  | SNVSV | + | - | G | G |

|       |        |     |       |   |   |   |   |
|-------|--------|-----|-------|---|---|---|---|
| ICAM2 | P13598 | 153 | GNETL | + | G | G | G |
| ICAM2 | P13598 | 176 | FNSTA | + | - | - | G |
| ICAM2 | P13598 | 187 | RNFSC | + | - | G | G |
| ICOSL | O75144 | 70  | QNSSL | + | G | G | - |
| ICOSL | O75144 | 102 | FNVTP | + | G | N | - |
| ICOSL | O75144 | 186 | QNDTV | + | P | G | G |
| ICOSL | O75144 | 225 | QNLTV | - | - | - | G |
| IDS   | P22304 | 115 | GNFST | + | - | - | G |
| IGHA1 | P01876 | 144 | ANLTC | + | P | - | - |
| IGHA1 | P01876 | 340 | VNVSV | + | P | G | P |
| IGHA2 | P01877 | 205 | ANITK | + | - | P | G |
| IGHG1 | P01857 | 180 | YNSTY | + | G | N | N |
| IGHM  | P01871 | 46  | KNNSD | + | G | G | G |
| IGJ   | P01591 | 71  | ENISD | + | G | G | G |
| IL2RA | P01589 | 70  | GNSSH | + | - | - | G |
| IL2RG | P31785 | 159 | ENLTL | + | G | - | G |
| IL4RA | P24394 | 53  | TNCST | - | - | G | G |
| IL6RA | P08887 | 93  | GNYSC | + | G | - | - |
| IL6RB | P40189 | 131 | KNLSC | + | G | G | - |
| IL6RB | P40189 | 157 | TNFTL | + | - | G | - |
| IL6RB | P40189 | 227 | HNLVS | + | P | G | P |
| IL6RB | P40189 | 379 | QNYTV | + | G | G | G |
| IL6RB | P40189 | 383 | VNATK | + | G | G | G |
| IL6RB | P40189 | 390 | VNLTN | + | - | G | G |
| INAR1 | P17181 | 81  | QNITS | - | G | G | - |
| INAR2 | P48551 | 58  | KNHSI | - | G | - | - |
| IPSP  | P05154 | 262 | GNATA | + | P | G | G |
| ISLR  | O14498 | 309 | ANGSL | - | - | G | G |
| ITB1  | P05556 | 520 | ENSSE | - | - | - | G |
| ITB1  | P05556 | 669 | FNITK | + | - | G | - |
| ITIH1 | P19827 | 285 | QNLTN | + | G | - | - |

|       |        |      |       |   |   |   |   |
|-------|--------|------|-------|---|---|---|---|
| ITM2B | Q9Y287 | 170  | LNTSI | + | G | G | G |
| JAG1  | P78504 | 559  | KNCSH | - | - | G | G |
| JAM3  | Q9BX67 | 192  | RNSSF | + | G | - | - |
| KAIN  | P29622 | 157  | LNDTM | + | - | P | - |
| KAIN  | P29622 | 238  | ENTTV | + | - | P | - |
| KI2L1 | P43626 | 178  | VNGTF | - | G | - | - |
| KIRR1 | Q96J84 | 46   | LNYSG | - | G | - | - |
| KIRR1 | Q96J84 | 140  | HNLTC | - | G | - | - |
| KIRR1 | Q96J84 | 297  | TNVST | + | - | - | P |
| KLK1  | P06870 | 102  | FNMSL | + | G | - | G |
| KLK1  | P06870 | 108  | ENHTR | + | G | - | G |
| KLK1  | P06870 | 165  | ENFSF | + | P | - | P |
| KLK11 | Q9UBX7 | 131  | FNNSL | - | - | - | G |
| KLK11 | Q9UBX7 | 197  | ANITI | - | - | G | - |
| KLK3  | P07288 | 69   | RNKSV | + | G | G | G |
| KLKB1 | P03952 | 494  | LNYTE | + | G | - | - |
| KLOT  | Q9UEF7 | 630  | VNITP | - | P | - | - |
| KNG1  | P01042 | 48   | QNQSN | + | P | P | P |
| KNG1  | P01042 | 169  | NNNTQ | + | P | G | P |
| KNG1  | P01042 | 205  | TNCSK | + | P | P | P |
| KNG1  | P01042 | 294  | NNATF | + | P | P | P |
| L1CAM | P32004 | 247  | TNSSS | - | G | - | - |
| L1CAM | P32004 | 479  | ANGTL | - | G | G | - |
| L1CAM | P32004 | 726  | GNETT | - | - | G | G |
| L1CAM | P32004 | 979  | HNLTD | - | G | - | G |
| LAIR1 | Q6GTX8 | 69   | YNDTE | + | G | G | G |
| LAMA5 | O15330 | 95   | PNQTI | - | - | - | G |
| LAMB1 | P07943 | 1041 | CNGSD | - | - | G | - |
| LAMP1 | P11279 | 62   | KNMTF | + | G | G | G |
| LAMP1 | P11279 | 76   | LNRSS | + | G | G | G |
| LAMP1 | P11279 | 84   | KENTS | + | G | G | G |

|       |        |      |       |   |   |   |   |
|-------|--------|------|-------|---|---|---|---|
| LAMP1 | P11279 | 121  | YNLSD | + | P | - | - |
| LAMP1 | P11279 | 130  | PNASS | + | P | - | - |
| LAMP1 | P11279 | 261  | PNKTS | + | G | G | G |
| LAMP2 | P13473 | 58   | TNKTY | + | - | G | - |
| LAMP2 | P13473 | 75   | YNGSI | + | G | G | G |
| LAMP2 | P13473 | 101  | ANFTK | + | G | - | - |
| LAMP2 | P13473 | 257  | PNTTH | + | G | G | G |
| LAMP3 | Q9UQV4 | 232  | LNGSR | - | N | P | N |
| LAMP3 | Q9UQV4 | 266  | PNATQ | - | G | - | G |
| LAYN  | Q6UX15 | 117  | SNSTA | - | - | - | G |
| LCAT  | P04180 | 44   | SNHTR | + | G | G | G |
| LCAT  | P04180 | 296  | FNYTG | + | - | - | G |
| LEPR  | P48357 | 56   | KNTSN | + | - | G | - |
| LEPR  | P48357 | 73   | FNSSG | + | - | G | - |
| LEPR  | P48357 | 81   | SNLSK | + | - | G | - |
| LEPR  | P48357 | 98   | RNCSL | + | - | G | - |
| LFA3  | P19256 | 169  | RNSTS | - | G | G | G |
| LG3BP | Q08380 | 69   | ENATQ | + | G | G | P |
| LG3BP | Q08380 | 125  | TNETR | + | G | G | G |
| LG3BP | Q08380 | 192  | SNVTM | + | G | G | G |
| LG3BP | Q08380 | 398  | LNLTE | + | G | G | G |
| LG3BP | Q08380 | 551  | TNSSK | + | G | G | G |
| LG3BP | Q08380 | 580  | TNSSG | + | G | G | G |
| LICH  | P38571 | 161  | LNKTG | + | - | G | - |
| LIFR  | P42702 | 64   | WNCSW | - | - | - | G |
| LIRB1 | Q8NHL6 | 281  | ANFTL | - | - | - | G |
| LMAN2 | Q12907 | 183  | NNGSL | + | G | - | G |
| LRC15 | Q8TF66 | 369  | QNISL | - | - | G | - |
| LRC19 | Q9H756 | 32   | CNFTE | - | - | G | G |
| LRC19 | Q9H756 | 37   | KNYTL | - | - | G | G |
| LRP1  | Q07954 | 2502 | VNCSC | - | - | G | - |

|       |        |      |       |   |   |   |   |
|-------|--------|------|-------|---|---|---|---|
| LRP1  | Q07954 | 2905 | CNASS | - | - | - | G |
| LRP1  | Q07954 | 4364 | CNCTD | - | - | G | G |
| LRP10 | Q7Z4F1 | 56   | ANCTW | - | G | - | G |
| LRP2  | P98164 | 178  | INCTE | - | - | G | G |
| LRP2  | P98164 | 299  | ENNTS | - | G | G | G |
| LRP2  | P98164 | 341  | HNDSR | - | G | - | - |
| LRP2  | P98164 | 388  | ANDSF | - | - | G | G |
| LRP2  | P98164 | 866  | INTTL | - | G | - | - |
| LRP2  | P98164 | 1144 | CNSTE | - | P | G | G |
| LRP2  | P98164 | 1186 | LNCTA | - | G | - | G |
| LRP2  | P98164 | 1383 | ANDSK | - | G | G | G |
| LRP2  | P98164 | 1496 | QNGTD | - | - | - | G |
| LRP2  | P98164 | 1675 | GNQSV | - | G | - | - |
| LRP2  | P98164 | 2224 | TNRTV | - | - | - | G |
| LRP2  | P98164 | 2499 | SNRTV | - | - | G | G |
| LRP2  | P98164 | 2781 | CNATT | - | G | G | G |
| LRP2  | P98164 | 2809 | DNNTS | - | - | - | G |
| LRP2  | P98164 | 2947 | QNCSD | - | P | P | G |
| LRP2  | P98164 | 3315 | ANNTF | - | - | G | G |
| LRP2  | P98164 | 3355 | TNKSU | - | - | G | - |
| LRP2  | P98164 | 3446 | VNTTH | - | G | - | G |
| LRP2  | P98164 | 4068 | YNLSS | - | - | G | G |
| LSAMP | Q13449 | 40   | DNITV | - | G | G | G |
| LSAMP | Q13449 | 300  | TNASL | + | G | G | G |
| LUM   | P51884 | 88   | ENVTD | + | G | - | - |
| LUM   | P51884 | 127  | NNLTE | - | P | - | G |
| LYAG  | P10253 | 140  | ENLSS | + | G | G | G |
| LYAG  | P10253 | 390  | ENMTR | + | G | G | G |
| LYAG  | P10253 | 470  | TNETG | + | G | G | G |
| LYAG  | P10253 | 882  | RNNTI | + | G | G | P |
| LYAG  | P10253 | 925  | SNFTY | + | P | G | P |

|       |        |      |       |   |   |   |   |
|-------|--------|------|-------|---|---|---|---|
| LYAM1 | P14151 | 60   | DNYTD | + | - | G | G |
| LYAM1 | P14151 | 104  | TNKSL | + | G | - | G |
| LYPD3 | O95374 | 163  | YNASD | - | - | G | - |
| LYVE1 | Q9Y5Y7 | 53   | LNFTF | + | P | G | P |
| MA2B2 | Q9Y2E5 | 748  | VNNSI | - | - | G | G |
| MADCA | Q13477 | 83   | RNASL | - | G | G | G |
| MCA32 | Q7Z6M3 | 51   | QNVSM | - | - | - | G |
| MEGF8 | Q7Z7M0 | 217  | HNVSA | - | - | - | G |
| MEGF8 | Q7Z7M0 | 421  | VNSTE | - | G | - | - |
| MEGF8 | Q7Z7M0 | 637  | HNESC | - | N | G | G |
| MEGF8 | Q7Z7M0 | 1115 | CNRTC | - | G | G | G |
| MEGF8 | Q7Z7M0 | 1201 | GNATG | - | G | G | G |
| MEGF8 | Q7Z7M0 | 1271 | TNVSS | + | G | G | G |
| MEGF8 | Q7Z7M0 | 1887 | CNQSG | - | - | G | - |
| MEGF9 | Q9H1U4 | 218  | CNQTT | - | G | G | G |
| MERTK | Q12866 | 329  | SNGSV | - | - | - | G |
| MERTK | Q12866 | 336  | FNTSA | - | - | - | G |
| MERTK | Q12866 | 454  | HNATC | - | G | - | - |
| MFAP4 | P55083 | 137  | ENNTA | + | G | - | - |
| MGA   | O43451 | 977  | ENCTA | - | - | G | G |
| MGA   | O43451 | 1323 | GNETQ | - | G | G | G |
| MGA   | O43451 | 1672 | RNVTA | - | G | G | G |
| MMRN1 | Q13201 | 97   | RNQTL | - | - | G | G |
| MMRN1 | Q13201 | 114  | QNLTL | + | G | G | G |
| MMRN1 | Q13201 | 120  | TNASI | + | G | G | G |
| MMRN1 | Q13201 | 136  | SNSTL | + | G | G | G |
| MMRN2 | Q9H8L6 | 845  | FNTTY | + | P | - | P |
| MPRI  | P11717 | 435  | CNKTA | - | - | G | - |
| MPRI  | P11717 | 1656 | RNGSS | - | G | G | - |
| MPRI  | P11717 | 2136 | VNGTI | - | - | - | G |
| MPZL1 | O95397 | 50   | ANGTQ | + | - | G | - |



|       |        |      |       |   |   |   |   |
|-------|--------|------|-------|---|---|---|---|
| MRC2  | Q9UBG0 | 69   | CNTSL | + | G | G | G |
| MRC2  | Q9UBG0 | 140  | SNISK | - | G | G | G |
| MRF   | Q9Y2G1 | 1129 | ANCSS | - | G | - | - |
| MSLN  | Q13421 | 388  | WNVTS | - | G | G | - |
| MSLN  | Q13421 | 523  | QNVSM | - | G | - | - |
| MUC18 | P43121 | 56   | GNLSH | - | - | G | G |
| MUC18 | P43121 | 418  | LNRTQ | - | G | G | G |
| MXRA8 | Q9BRK3 | 306  | GNGSS | - | G | - | - |
| NAGAB | P17050 | 177  | LNATG | + | G | - | - |
| NAGAB | P17050 | 201  | VNYSL | + | G | - | - |
| NAPSA | O96009 | 133  | ANGTK | - | G | G | - |
| NBL1  | P41271 | 38   | KNITQ | - | G | G | G |
| NCAM1 | P13591 | 459  | SNYSN | + | - | G | G |
| NCAM1 | P13591 | 488  | YNCTA | - | - | G | - |
| NCAM2 | O15394 | 177  | INKSD | - | - | - | G |
| NEGR1 | Q7Z3B1 | 275  | QNFST | - | P | P | P |
| NEGR1 | Q7Z3B1 | 286  | TNVTQ | - | G | - | G |
| NEGR1 | Q7Z3B1 | 294  | GNYTC | - | G | - | G |
| NEO1  | Q92859 | 73   | LNCSA | + | - | G | G |
| NEO1  | Q92859 | 210  | SNATE | - | - | G | G |
| NEP   | P08473 | 145  | INESA | + | - | G | G |
| NEP   | P08473 | 285  | ANATA | + | - | G | G |
| NEUS  | Q99574 | 157  | ENNTN | - | - | - | G |
| NKG2D | P26718 | 131  | QNASL | - | - | G | - |
| NKG2D | P26718 | 202  | ENCST | - | - | - | G |
| NOTC2 | Q04721 | 46   | HNGTG | - | - | G | - |
| NPC2  | P61916 | 58   | VNVTF | - | P | - | - |
| NPTN  | Q9Y639 | 197  | KNASN | - | - | G | - |
| NPTN  | Q9Y639 | 229  | ANATI | + | - | - | G |
| NRX3A | Q9Y4C0 | 105  | VNDSS | - | G | - | G |
| NTRI  | Q9P121 | 44   | DNVTV | - | G | G | G |

|       |        |      |       |   |   |   |   |
|-------|--------|------|-------|---|---|---|---|
| NTRK2 | Q16620 | 67   | ENITE | + | - | G | - |
| NTRK2 | Q16620 | 95   | RNLTI | + | - | G | - |
| NTRK2 | Q16620 | 241  | MNETS | + | G | G | G |
| NTRK2 | Q16620 | 254  | TNISS | + | G | G | G |
| NTRK2 | Q16620 | 325  | LNESK | - | G | - | - |
| OLFM4 | Q6UX06 | 72   | SNFTG | - | - | G | P |
| OLFM4 | Q6UX06 | 352  | VNLTT | - | - | G | G |
| OLFM4 | Q6UX06 | 411  | LNDTT | - | - | G | - |
| OMD   | Q99983 | 316  | MNLTV | - | G | - | - |
| OPCM  | Q14982 | 44   | DNVTV | - | G | G | G |
| OPCM  | Q14982 | 285  | FNVSE | - | - | G | G |
| OPCM  | Q14982 | 293  | GNYTC | - | - | G | G |
| OSCAR | Q8IYS5 | 156  | RNMSF | - | P | P | G |
| P3IP1 | Q96FE7 | 66   | GNHSY | - | G | P | P |
| PAG15 | Q8NCC3 | 289  | INYTL | - | G | - | G |
| PAPP2 | Q9BXP8 | 857  | TNKSL | - | G | - | G |
| PAPP2 | Q9BXP8 | 1408 | VNCTS | - | - | - | G |
| PCD16 | Q96JQ0 | 217  | ENRSH | - | - | - | G |
| PCD16 | Q96JQ0 | 256  | FNQSR | - | - | - | G |
| PCDGK | Q9UN70 | 245  | FNQSL | - | - | - | G |
| PCDGK | Q9UN70 | 424  | YNLSI | - | - | G | - |
| PCDH1 | Q08174 | 305  | ANDSD | + | - | - | G |
| PCDH1 | Q08174 | 813  | VNETL | + | - | - | G |
| PCDH1 | Q08174 | 818  | ANRTL | + | - | - | G |
| PCP   | P42785 | 47   | KNYSV | - | G | G | G |
| PCP   | P42785 | 415  | KNISS | + | - | - | G |
| PD1L2 | Q9BQ51 | 189  | RNFSC | - | G | G | G |
| PEAR1 | Q5VY43 | 575  | VNCSN | - | - | G | - |
| PECA1 | P16284 | 84   | YNISS | + | - | - | G |
| PECA1 | P16284 | 151  | VNCSV | + | - | - | G |
| PERM  | P05164 | 355  | RNMSN | + | - | G | - |

|       |        |     |       |   |   |   |   |
|-------|--------|-----|-------|---|---|---|---|
| PERM  | P05164 | 729 | VNCST | + | - | G | - |
| PGCA  | P16112 | 333 | ANQTG | - | - | - | G |
| PGCA  | P16112 | 657 | PNQTG | + | G | G | G |
| PGCP  | Q9Y646 | 179 | INYSR | + | P | G | P |
| PGFRA | P16234 | 42  | LNSSF | - | G | - | G |
| PGRP2 | Q96PD5 | 367 | ANATK | + | G | G | G |
| PGS1  | P31810 | 270 | ENGSL | + | - | G | G |
| PI16  | Q6UXB8 | 114 | YNLSA | - | G | - | G |
| PI16  | Q6UXB8 | 403 | PNTSA | - | G | - | G |
| PI16  | Q6UXB8 | 409 | ANATG | - | G | - | G |
| PIGR  | P01833 | 83  | ANLTN | + | G | G | G |
| PIGR  | P01833 | 90  | ENGTF | + | G | G | G |
| PIGR  | P01833 | 421 | GNGTF | + | P | - | - |
| PIGR  | P01833 | 469 | GNVTA | + | G | G | G |
| PIGR  | P01833 | 499 | WNNTG | + | P | P | P |
| PLBL2 | Q8NHP8 | 88  | ANLTN | + | - | G | G |
| PLBL2 | Q8NHP8 | 465 | RNQSL | + | G | G | G |
| PLD3  | Q8IV08 | 387 | DNHTH | - | - | - | G |
| PLDX1 | Q8IU5K | 115 | ANRSQ | - | - | - | G |
| PLXB2 | O15031 | 528 | QNMSR | - | G | G | G |
| PLXD1 | Q9Y4D7 | 583 | TNSSQ | - | - | G | G |
| PODXL | O00593 | 360 | LNLTG | - | - | G | G |
| PPAL  | P11117 | 167 | QNETR | + | G | G | G |
| PPAL  | P11117 | 177 | QNESS | + | G | N | P |
| PPAL  | P11117 | 267 | KNLTL | + | - | G | P |
| PPAL  | P11117 | 331 | RNESD | + | - | G | - |
| PPAP  | P15309 | 94  | LNESY | + | P | P | G |
| PPAP  | P15309 | 220 | HNFTL | + | G | G | G |
| PPAP  | P15309 | 333 | RNETQ | + | P | P | P |
| PPGB  | P10619 | 333 | TNTTA | + | - | G | - |
| PPIC  | P45877 | 190 | TNCIS | - | - | - | G |

|       |        |     |       |   |   |   |   |
|-------|--------|-----|-------|---|---|---|---|
| PPT1  | P50897 | 197 | RNHSI | + | - | G | G |
| PPT2  | Q9UMR5 | 289 | SNRTL | - | - | G | G |
| PRG2  | P13737 | 86  | KNLTC | + | G | - | G |
| PRIO  | P04156 | 197 | ENFTE | + | - | G | G |
| PRND  | Q9UKY0 | 110 | INATQ | - | - | G | G |
| PROM1 | O43490 | 206 | LNETP | - | N | - | G |
| PROM1 | O43490 | 220 | YNTTK | - | - | - | G |
| PROM1 | O43490 | 274 | MNSTL | - | - | G | G |
| PROM1 | O43490 | 395 | DNVTQ | - | - | G | - |
| PROM2 | Q8N271 | 540 | KNISI | - | - | G | G |
| PROM2 | Q8N271 | 725 | RNVSE | - | - | G | - |
| PTGDS | P41222 | 51  | SNSSW | + | P | G | G |
| PTGDS | P41222 | 78  | LNLTS | + | P | G | P |
| PTK7  | Q13308 | 116 | ANASF | + | G | - | - |
| PTK7  | Q13308 | 175 | SNHTV | + | - | G | G |
| PTK7  | Q13308 | 283 | ANGSL | + | - | - | G |
| PTPRG | P23470 | 156 | SNGSA | - | G | G | - |
| PTPRG | P23470 | 444 | ANTTR | + | - | - | G |
| PTPRJ | Q12913 | 142 | SNDTA | - | - | G | G |
| PTPRJ | Q12913 | 351 | ANGTE | + | - | G | - |
| PTPRJ | Q12913 | 413 | LNVSE | + | - | - | G |
| PTPRJ | Q12913 | 937 | TNITF | + | G | - | G |
| PTPRK | Q15262 | 140 | WNVTG | - | - | - | G |
| PTPRM | P28827 | 131 | WNISG | + | - | G | - |
| PTPRM | P28827 | 598 | LNQTD | - | - | - | G |
| PTPRZ | P23471 | 677 | TNYTE | - | - | G | G |
| PTTG  | P53801 | 54  | KNVSC | - | - | G | G |
| PTTG  | P53801 | 54  | KNVSC | - | - | G | G |
| PVRL1 | Q15223 | 286 | LNGSL | - | - | G | - |
| PVRL4 | Q96NY8 | 281 | YNWTR | - | - | G | G |
| PXDC2 | Q6UX71 | 160 | VNLSF | + | P | - | - |

|       |        |     |       |   |   |   |   |
|-------|--------|-----|-------|---|---|---|---|
| QPCT  | Q16769 | 49  | LNSSA | + | G | G | G |
| QPCT  | Q16769 | 296 | QNYSY | - | P | G | P |
| QSOX1 | O00391 | 575 | RNSTL | - | - | G | G |
| RAB14 | P61106 | 111 | RNLTN | - | N | - | P |
| RAMP3 | O60896 | 103 | SNCTV | - | G | - | - |
| RGMA  | Q96B86 | 114 | HNCSK | - | - | G | G |
| RN149 | Q8NC42 | 131 | RNASA | - | - | G | P |
| RN149 | Q8NC42 | 145 | GNITL | - | G | - | - |
| RNAS1 | P07998 | 104 | SNSSM | + | P | P | P |
| RNAS1 | P07998 | 116 | TNGSR | + | G | G | - |
| RNAS2 | P10153 | 86  | PNMTC | + | G | G | G |
| RNAS2 | P10153 | 92  | SNKTR | + | G | G | G |
| RNAS2 | P10153 | 111 | CNLTT | + | G | G | P |
| RNAS2 | P10153 | 119 | QNISN | + | G | G | P |
| RNAS6 | Q93091 | 55  | NNYTQ | - | G | - | - |
| RNF13 | O43567 | 88  | DNSSG | + | - | G | - |
| RNT2  | O00584 | 212 | QNCTE | - | G | G | G |
| ROBO4 | Q8WZ75 | 360 | GNGTV | - | G | - | G |
| ROR1  | Q01973 | 315 | YNSTG | - | - | G | G |
| ROR2  | Q01974 | 70  | NNITI | - | G | - | - |
| RTN4R | Q9BZR6 | 179 | GNLTH | + | G | - | G |
| S28A1 | O00337 | 643 | YNHTI | - | G | G | G |
| S39AE | Q15043 | 77  | GNVTQ | + | G | - | - |
| SAP   | P07602 | 80  | DNATE | + | G | G | G |
| SAP   | P07602 | 101 | PNMSA | + | G | G | G |
| SAP   | P07602 | 215 | TNSTF | + | P | P | P |
| SAP   | P07602 | 332 | NNKTE | + | - | - | G |
| SAP   | P07602 | 426 | KNSTK | + | G | G | G |
| SDK1  | Q7Z5N4 | 271 | ENKTS | - | G | - | G |
| SDK1  | Q7Z5N4 | 301 | GNRSV | - | - | - | G |
| SE6L2 | Q6UXD5 | 247 | ANSSM | - | - | G | - |

|       |        |     |       |   |   |   |   |
|-------|--------|-----|-------|---|---|---|---|
| SE6L2 | Q6UXD5 | 373 | PNLTC | - | - | G | G |
| SEM4B | Q9NPR2 | 520 | ANCSL | - | G | - | - |
| SEM5A | Q13591 | 142 | TNRSL | - | - | G | P |
| SEM5A | Q13591 | 147 | SNLTE | - | - | - | G |
| SFRP4 | Q6FHJ7 | 116 | YNHSW | - | - | G | - |
| SHBG  | P04278 | 380 | LNRSH | + | G | - | G |
| SHPS1 | P78324 | 245 | ANLSE | + | P | P | P |
| SHPS1 | P78324 | 270 | VNVTC | + | - | G | G |
| SHPS1 | P78324 | 292 | GNVSR | + | - | G | G |
| SHSA7 | A6NL88 | 59  | ANGTR | - | - | G | G |
| SIA10 | Q9Y274 | 308 | HNVTA | + | - | G | - |
| SIAE  | Q9HAT2 | 267 | CNMTL | - | G | - | - |
| SIAE  | Q9HAT2 | 401 | KNLTF | + | G | G | G |
| SIRB1 | O00241 | 244 | ANLSE | + | - | G | G |
| SIRB1 | O00341 | 291 | GNVSR | - | - | G | G |
| SIRBL | Q5TFQ8 | 244 | ANLSE | - | P | P | P |
| SIRBL | Q5TFQ8 | 291 | GNVSR | - | - | G | G |
| SLAF1 | Q13291 | 102 | ENLTL | - | - | - | G |
| SLAF5 | Q9UIB8 | 146 | VNSTC | - | - | - | G |
| SLAF5 | Q9UIB8 | 150 | CNVTL | - | G | - | - |
| SLIK1 | Q96PX8 | 253 | LNETT | - | G | - | G |
| SMO   | Q99835 | 188 | FNSSG | - | - | G | - |
| SN    | Q9BZZ2 | 265 | VNSSY | - | - | - | G |
| SODE  | P08294 | 107 | PNSSS | + | - | G | - |
| SORL  | Q92673 | 674 | SNCSC | - | - | G | G |
| SORL  | Q92673 | 871 | VNSSV | - | G | - | G |
| SORT  | Q99523 | 162 | INNTF | + | - | G | G |
| SORT  | Q99523 | 406 | TNVTS | + | - | - | G |
| SPIT2 | O43291 | 94  | ENATG | - | - | P | G |
| SPRC  | P09486 | 116 | DNKTF | + | G | - | - |
| SPRL1 | Q14515 | 169 | RNYSH | - | G | - | G |

|       |        |      |       |   |   |   |   |
|-------|--------|------|-------|---|---|---|---|
| SPRL1 | Q14515 | 176  | LNRSS | - | G | - | G |
| SPRL1 | Q14515 | 412  | ENSSN | + | - | G | P |
| SPRL1 | Q14515 | 476  | DNQTY | - | - | G | - |
| STAB1 | Q9NY15 | 133  | RNGTC | - | - | G | - |
| STAB2 | Q8WWQ8 | 1275 | NNDTT | - | - | G | - |
| SUSD2 | Q9UGT4 | 162  | VNETR | - | G | G | - |
| SUSD2 | Q9UGT4 | 494  | SNGTE | - | G | - | G |
| SUSD5 | O60379 | 354  | KNDSK | - | G | G | G |
| SVEP1 | Q4LDE5 | 3186 | ENITH | - | - | - | G |
| T132A | Q24JP5 | 71   | ANSSL | - | - | G | - |
| TARSH | Q7Z7G0 | 313  | KNETL | - | - | - | G |
| TARSH | Q7Z7G0 | 892  | TNQTF | - | G | G | - |
| TARSH | Q7Z7G0 | 904  | PNTSY | - | G | G | - |
| TENA  | P24821 | 166  | GNFST | - | - | - | G |
| TENA  | P24821 | 184  | PNCSE | + | - | G | G |
| TENA  | P24821 | 327  | INGTC | - | - | G | - |
| TENA  | P24821 | 1485 | YNISG | + | - | - | G |
| TENR  | Q92752 | 55   | YNTSS | - | - | G | G |
| TENR  | Q92752 | 198  | KNCSE | - | - | G | G |
| TENX  | P22105 | 3965 | PNLTS | + | G | - | - |
| TFPI1 | P10646 | 145  | NNQTK | + | G | - | G |
| TGFR2 | P37173 | 70   | SNCSI | - | G | - | G |
| TGFR2 | P37173 | 94   | ENITL | - | G | - | - |
| TGON3 | O43493 | 39   | GNVST | - | - | G | - |
| THBG  | P05543 | 36   | PNATL | + | - | G | G |
| THBG  | P05543 | 165  | SNISA | + | - | G | G |
| THRB  | P00734 | 121  | VNITR | + | G | - | - |
| THRB  | P00734 | 143  | INSTT | + | G | P | G |
| THY1  | P04216 | 42   | ENTSS | + | G | G | P |
| THY1  | P04216 | 119  | QNVTV | + | G | G | G |
| TIMP1 | P01033 | 101  | HNRSE | + | - | G | - |

|       |        |     |       |   |   |   |   |
|-------|--------|-----|-------|---|---|---|---|
| TINAL | Q9GZM7 | 78  | CNRTV | + | - | G | G |
| TIP   | Q8TB96 | 482 | KNGSA | - | G | - | - |
| TMED9 | Q9BVK6 | 125 | SNSTK | + | G | - | - |
| TMEM9 | Q9P0T7 | 38  | RNISG | - | G | G | G |
| TMM25 | Q86YD3 | 106 | LNCSL | - | - | - | G |
| TMPS3 | O15393 | 213 | LNTSA | - | - | G | - |
| TMPS3 | O15393 | 249 | LNSSR | - | - | - | G |
| TNR11 | Q9Y6Q6 | 105 | GNSTT | - | G | - | - |
| TNR11 | Q9Y6Q6 | 174 | TNCTF | - | G | - | G |
| TNR19 | Q9NS68 | 105 | ANCSA | - | - | G | - |
| TNR1A | P19438 | 54  | QNNSI | - | G | G | G |
| TNR3  | P36941 | 177 | QNTSS | - | G | - | - |
| TPP1  | O14773 | 443 | FNASG | + | G | G | G |
| TPST2 | O60704 | 368 | QNSTS | - | - | G | G |
| TR10C | O14798 | 77  | TNASN | - | - | G | G |
| TRBM  | P07204 | 115 | NNTSY | - | - | G | G |
| TRBM  | P07204 | 382 | LNQTS | - | G | - | G |
| TRFE  | P02787 | 432 | YNKSD | + | G | - | G |
| TRFL  | P02788 | 156 | LNWTG | + | G | - | - |
| TRFL  | P02788 | 497 | FNQTG | + | G | G | - |
| TRFL  | P02788 | 642 | RNGSD | + | - | P | - |
| TRFM  | P08582 | 38  | GNMSE | - | - | G | G |
| TRFM  | P08582 | 515 | FNASC | - | G | - | - |
| TRHDE | Q9UKU6 | 684 | INQTG | - | - | - | G |
| TSN1  | O60635 | 141 | WNTTM | + | - | G | - |
| TSN1  | O60635 | 154 | TNYTD | + | G | G | G |
| TSN8  | P19075 | 118 | VNETL | + | - | G | - |
| TTYH3 | Q9C0H2 | 351 | LNGTE | - | - | - | G |
| TWSG1 | Q9GZX9 | 52  | GNCSG | - | G | G | G |
| TWSG1 | Q9GZX9 | 81  | RNYSD | - | G | G | G |
| TYRO3 | Q06418 | 63  | LNCSV | - | - | G | G |



|       |        |      |       |   |   |   |   |
|-------|--------|------|-------|---|---|---|---|
| TYRO3 | Q06418 | 191  | LNVTG | - | G | G | G |
| TYRO3 | Q06418 | 230  | FNITV | - | G | - | G |
| TYRO3 | Q06418 | 240  | SNASV | - | - | G | G |
| TYRO3 | Q06418 | 293  | TNYSL | - | - | - | G |
| TYRO3 | Q06418 | 380  | ANLTG | - | - | G | G |
| UFO   | P30530 | 157  | FNLSC | - | G | - | G |
| UFO   | P30530 | 198  | LNKTS | - | - | G | - |
| UFO   | P30530 | 339  | ENISA | - | G | G | P |
| UFO   | P30530 | 345  | RNGSQ | - | G | G | G |
| UPAR  | Q03405 | 184  | NNDTF | + | G | - | - |
| UPAR  | Q03405 | 222  | GNSTH | - | - | G | G |
| UROK  | P00749 | 322  | ENSTD | + | - | G | G |
| UROM  | P07911 | 232  | LNGTH | + | P | P | P |
| UROM  | P07911 | 275  | YNLTA | + | G | G | - |
| UROM  | P07911 | 322  | FNITD | - | P | P | P |
| UROM  | P07911 | 513  | SNATD | - | G | G | G |
| VAS1  | Q15904 | 170  | LNASL | - | G | G | G |
| VASN  | Q6EMK4 | 117  | TNETF | + | G | G | G |
| VASN  | Q6EMK4 | 273  | SNLSL | + | P | - | - |
| VASN  | Q6EMK4 | 500  | RNLSG | - | N | P | P |
| VASN  | Q6EMK4 | 528  | PNATY | - | G | - | G |
| VCAM1 | P19320 | 273  | GNATL | - | G | - | N |
| VNN1  | O95497 | 283  | PNSSR | + | - | - | G |
| VTCN1 | Q7Z7D3 | 160  | YNASS | - | - | G | G |
| VTNC  | P04004 | 86   | NNATV | + | - | G | G |
| VTNC  | P04004 | 169  | KNGSL | + | G | G | G |
| VTNC  | P04004 | 242  | RNISD | + | G | G | G |
| VWF   | P04275 | 1515 | FNRSK | + | - | - | G |
| VWF   | P04275 | 2223 | GNVSS | + | - | G | - |
| VWF   | P04275 | 2357 | PNFTC | + | G | - | - |
| WFDC2 | Q14508 | 44   | QNCTQ | + | G | G | P |

|       |        |     |       |   |   |   |   |
|-------|--------|-----|-------|---|---|---|---|
| WISP1 | O95388 | 86  | DNCTE | - | - | G | - |
| YK047 | Q68D85 | 216 | LNSSQ | - | - | - | G |
| ZA2G  | P25311 | 109 | YNDSN | + | P | G | P |
| ZA2G  | P25311 | 112 | SNGSH | + | P | G | P |
| ZA2G  | P25311 | 128 | NNRSS | + | G | P | P |

---

**Supplementary Table S6** | The proteomic and glycoproteomic performance of the GlycoFilter platform on three human plasma samples (**P1**, **P2** and **P3**). <sup>18</sup>O-incorporated peptides designated those peptides containing deamidated asparagine with one <sup>18</sup>O-atom. Deglycopeptides were defined by meeting two criteria: 1) the asparagine was deamidated and incorporated by one <sup>18</sup>O-atom, and 2) such specific asparagine was in a N-glycosylation consensus motif “NXS/T” (X is any amino acid except proline).

| <b>Sample</b> | <b>Proteins</b> | <b>Peptides</b> | <b><sup>18</sup>O-incorporated peptides</b> | <b>Deglycopeptides (NXS/T)</b> | <b>Glycoproteins</b> |
|---------------|-----------------|-----------------|---------------------------------------------|--------------------------------|----------------------|
| <b>P1</b>     | <b>306</b>      | <b>3556</b>     | <b>262</b>                                  | <b>238</b>                     | <b>115</b>           |
| <b>P2</b>     | <b>327</b>      | <b>3879</b>     | <b>293</b>                                  | <b>259</b>                     | <b>125</b>           |
| <b>P3</b>     | <b>317</b>      | <b>3762</b>     | <b>251</b>                                  | <b>225</b>                     | <b>119</b>           |

**Supplementary Table S7** | The complete list of non-redundant N-glycosites (295), spanning in 141 glycoproteins, identified in three biological plasma samples (**P1**, **P2** and **P3**). G: the site was detected as the deglycosylated form only (<sup>18</sup>O-incorporated aspartic acid); N: the glycosite was detected as the non-glycosylated form only (asparagine); P: the glycosite was detected as both the non-glycosylated and deglycosylated forms; (-): the glycosite was not detected in specific sample. Glycosites reported in the database UniProtKB (<http://www.uniprot.org/>) are annotated as (+). Those have not been confirmed as glycosylated in UniProtKB are annotated as (-). A glycosite was considered as partially occupied (**PO**) if its non-glycosylated form (asparagine) was detected in any sample.

| Gene name | Accession # | Glycosite # | Consensus Sequence | Status in UniProt | P1 | P2 | P3 |
|-----------|-------------|-------------|--------------------|-------------------|----|----|----|
| A1AG1     | P02763      | 56          | YNKSV              | +                 | G  | G  | G  |
| A1AG1     | P02763      | 72          | PNKTE              | +                 | G  | G  | G  |
| A1AG1     | P02763      | 93          | YNTTY              | +                 | P  | P  | G  |
| A1AG2     | P19652      | 56          | YNKSV              | +                 | G  | G  | G  |
| A1AG2     | P19652      | 72          | PNKTE              | +                 | G  | G  | G  |
| A1AG2     | P19652      | 93          | YNSSY              | +                 | G  | P  | P  |
| A1AT      | P01009      | 271         | GNATA              | +                 | -  | P  | P  |
| A1BG      | P04217      | 179         | GNYSC              | +                 | -  | G  | -  |
| A1BG      | P04217      | 363         | HNISV              | +                 | G  | G  | -  |
| A1BG      | P04217      | 371         | ANYSC              | +                 | G  | G  | -  |
| A2GL      | P02750      | 186         | ANFTL              | +                 | G  | G  | G  |
| A2GL      | P02750      | 325         | QNDTR              | +                 | G  | G  | G  |
| A2MG      | P01023      | 55          | LNETV              | +                 | G  | P  | -  |
| A2MG      | P01023      | 396         | SNATT              | +                 | G  | G  | G  |
| A2MG      | P01023      | 410         | INTTN              | +                 | G  | G  | G  |
| A2MG      | P01023      | 869         | VNFTV              | +                 | P  | P  | P  |
| AACT      | P01011      | 106         | FNLTE              | +                 | P  | P  | G  |
| AACT      | P01011      | 127         | LNQSS              | +                 | G  | G  | G  |
| AACT      | P01011      | 271         | GNASA              | +                 | G  | G  | G  |
| AFAM      | P43652      | 33          | FNSTQ              | +                 | G  | G  | G  |
| AFAM      | P43652      | 109         | HNFHS              | +                 | G  | G  | -  |
| AFAM      | P43652      | 402         | FNETT              | +                 | G  | G  | G  |

|       |        |      |       |   |   |   |   |
|-------|--------|------|-------|---|---|---|---|
| ALS   | P35858 | 368  | MNLSG | + | G | G | G |
| AMBP  | P02760 | 250  | YNGTS | + | G | G | G |
| AMPN  | P15144 | 234  | FNITL | + | - | - | G |
| AMPN  | P15144 | 818  | RNATL | + | G | - | G |
| ANGT  | P01019 | 47   | HNEST | + | P | P | P |
| ANT3  | P01008 | 128  | CNDTL | + | G | P | G |
| ANT3  | P01008 | 187  | FNETY | + | G | G | G |
| ANT3  | P01008 | 224  | SNKTE | + | G | G | G |
| AOC3  | Q16853 | 592  | SNHSN | + | G | G | - |
| APMAP | Q9HDC9 | 160  | PNGTL | + | - | G | - |
| APOA  | P08519 | 61   | HNRTT | - | - | - | G |
| APOB  | P04114 | 185  | GNCST | + | G | G | G |
| APOB  | P04114 | 983  | SNASS | - | G | - | - |
| APOB  | P04114 | 1523 | FNSSY | + | P | G | G |
| APOB  | P04114 | 2982 | LNFSK | + | P | P | P |
| APOB  | P04114 | 3411 | HNSTV | + | - | N | G |
| APOB  | P04114 | 3895 | YNATW | + | G | P | G |
| APOC4 | P55056 | 63   | VNRTR | + | P | P | P |
| APOD  | P05090 | 65   | ANYSL | + | P | P | P |
| APOD  | P05090 | 98   | VNLTE | + | G | G | G |
| APOF  | Q13790 | 118  | VNATQ | - | - | G | - |
| APOH  | P02749 | 162  | GNNSL | + | G | G | G |
| APOH  | P02749 | 183  | GNDTI | + | G | G | G |
| APOH  | P02749 | 193  | GNWTK | + | G | G | G |
| APOH  | P02749 | 253  | GNWSA | + | G | P | P |
| APOM  | O95445 | 135  | LNETG | + | P | G | P |
| ATRN  | O75882 | 264  | SNSSD | + | G | G | - |
| ATRN  | O75882 | 300  | CNSSD | + | - | - | G |
| ATRN  | O75882 | 325  | ANQSF | - | - | G | G |
| ATRN  | O75882 | 383  | LNRSV | + | - | - | G |
| ATRN  | O75882 | 428  | HNESW | + | G | G | G |

|       |        |      |        |   |   |   |   |
|-------|--------|------|--------|---|---|---|---|
| ATRN  | O75882 | 731  | RNHSC  | + | G | P | - |
| ATRN  | O75882 | 914  | LNGSV  | - | G | G | G |
| ATRN  | O75882 | 923  | ANHSA  | - | G | G | G |
| ATRN  | O75882 | 1043 | LNSSM  | + | G | G | G |
| ATRN  | O75882 | 1054 | YNWSF  | - | G | G | G |
| ATRN  | O75882 | 1073 | INQSI  | - | G | G | G |
| ATRN  | O75882 | 1082 | ENLTT  | - | P | - | - |
| ATRN  | O75882 | 1198 | INASK  | + | P | P | N |
| ATS13 | Q76LX8 | 552  | DNSTC  | - | G | - | G |
| BTD   | P43251 | 119  | FNFTTR | + | G | G | G |
| BTD   | P43251 | 150  | FNDTE  | + | G | G | G |
| BTD   | P43251 | 203  | NNGTL  | + | - | G | - |
| BTD   | P43251 | 349  | ENATG  | + | G | G | G |
| C163A | Q86VB7 | 105  | ANSSA  | + | - | G | G |
| C163A | Q86VB7 | 123  | GNESA  | - | - | G | - |
| C1QA  | P02745 | 146  | QNHSG  | + | G | G | G |
| C1R   | P00736 | 221  | CNYSI  | + | G | G | G |
| C1R   | P00736 | 514  | SNASL  | + | G | G | G |
| C1RL  | Q9NZP8 | 296  | KNQSV  | + | N | G | G |
| C1S   | P09871 | 174  | VNCSG  | + | G | G | G |
| C4BPA | P04003 | 221  | ENETI  | + | G | G | - |
| C4BPA | P04003 | 506  | ENVTI  | + | - | G | G |
| C4BPA | P04003 | 528  | GNRTW  | + | - | G | G |
| C4BPB | P20851 | 71   | DNTTT  | + | - | G | - |
| C4BPB | P20851 | 98   | VNVSD  | + | G | G | G |
| CAD13 | P55290 | 638  | INNTH  | + | G | G | G |
| CBG   | P08185 | 96   | FNLTE  | + | G | G | G |
| CBG   | P08185 | 369  | LNLTS  | + | G | G | - |
| CBPB2 | Q96IY4 | 73   | VNASD  | + | G | - | G |
| CD14  | P08571 | 151  | RNVSW  | + | - | G | G |
| CD44  | P16070 | 57   | FNSTL  | + | G | G | G |

|       |        |      |       |   |   |   |   |
|-------|--------|------|-------|---|---|---|---|
| CERU  | P00450 | 138  | DNTTD | + | G | G | - |
| CERU  | P00450 | 358  | CNKSS | + | P | P | P |
| CERU  | P00450 | 397  | ENLTA | + | G | G | G |
| CERU  | P00450 | 762  | QNVSN | + | G | P | P |
| CFAB  | P00751 | 122  | YNVSD | + | G | G | G |
| CFAB  | P00751 | 285  | SNFTG | + | G | - | - |
| CFAB  | P00751 | 378  | WNRTR | + | G | G | G |
| CFAH  | P08603 | 529  | LNDTL | + | G | G | - |
| CFAH  | P08603 | 802  | VNCSM | + | G | G | - |
| CFAH  | P08603 | 822  | HNMTT | + | G | G | - |
| CFAH  | P08603 | 882  | INSSR | + | P | G | G |
| CFAH  | P08603 | 911  | ENETT | + | G | P | G |
| CFAH  | P08603 | 1029 | SNVTC | + | G | P | P |
| CFAI  | P05156 | 70   | KNGTA | + | G | G | G |
| CFAI  | P05156 | 103  | NNGTC | + | G | G | G |
| CFAI  | P05156 | 177  | INSTE | + | P | P | P |
| CFAI  | P05156 | 464  | PNDTC | + | - | G | G |
| CHL1  | O00533 | 767  | TNHTL | + | G | - | - |
| CHLE  | P06276 | 85   | WNATK | + | G | G | G |
| CHLE  | P06276 | 369  | DNNSI | + | - | G | G |
| CLUS  | P10909 | 86   | LNETR | + | P | G | G |
| CLUS  | P10909 | 103  | CNETM | + | G | G | G |
| CLUS  | P10909 | 145  | LNQSS | + | G | G | G |
| CLUS  | P10909 | 354  | LNTSS | + | G | G | - |
| CLUS  | P10909 | 374  | ANLTQ | + | G | G | G |
| CNDP1 | Q96KN2 | 382  | MNVSA | + | G | G | - |
| CO2   | P06681 | 112  | GNVSF | + | - | G | G |
| CO2   | P06681 | 333  | ENGTG | + | G | G | G |
| CO2   | P06681 | 467  | GNMSA | + | G | - | - |
| CO2   | P06681 | 471  | ANASD | + | G | - | - |
| CO2   | P06681 | 621  | LNGSK | + | G | G | G |

|       |        |      |        |   |   |   |   |
|-------|--------|------|--------|---|---|---|---|
| CO2   | P06681 | 651  | PNLTD  | + | G | - | - |
| CO3   | P01034 | 85   | GNVTF  | + | G | G | G |
| CO3   | P01034 | 939  | MNKTV  | + | - | - | G |
| CO4A  | POCOL4 | 226  | SNSST  | + | G | G | G |
| CO4A  | POCOL4 | 1328 | LNVTL  | + | G | G | G |
| CO4A  | POCOL4 | 1391 | KNTTC  | + | G | P | G |
| CO4B  | POCOL5 | 226  | SNSST  | + | G | G | G |
| CO4B  | POCOL5 | 1328 | LNVTL  | + | G | G | G |
| CO4B  | POCOL5 | 1391 | KNTTC  | + | G | G | G |
| CO7   | P10643 | 754  | RNYTL  | + | G | G | G |
| CO8A  | P07357 | 437  | QNRST  | + | G | P | G |
| CO8B  | P07358 | 101  | CNFSD  | - | N | P | P |
| CO9   | P02748 | 415  | VNITS  | + | - | G | - |
| COMP  | P49747 | 121  | GNGSH  | - | G | G | - |
| CPN2  | P22792 | 74   | PNLTK  | - | - | - | G |
| CPN2  | P22792 | 348  | NNLTA  | + | G | G | G |
| CPN2  | P22792 | 359  | QNL SK | + | G | G | G |
| CR2   | P20023 | 823  | MNGSR  | - | - | - | G |
| CR2   | P20023 | 911  | VNCSS  | - | - | - | G |
| DOPO  | P09172 | 184  | INGSG  | + | - | G | - |
| DOPO  | P09172 | 566  | CNKSS  | - | - | G | G |
| DPP4  | P27487 | 150  | PNNTQ  | + | G | G | G |
| ECM1  | Q16610 | 444  | HNM TA | + | - | G | - |
| ENPP2 | Q13822 | 411  | ANLTC  | - | G | G | - |
| F13B  | P05160 | 162  | GNYST  | + | G | G | G |
| FA10  | P00743 | 231  | NNLTR  | + | G | G | G |
| FA11  | P03951 | 126  | YNSSV  | + | G | G | G |
| FA11  | P03951 | 491  | VNYTD  | + | G | G | G |
| FA12  | P00748 | 249  | RNVTA  | + | - | - | G |
| FA12  | P00748 | 433  | RNHSC  | + | P | P | P |
| FA5   | P12259 | 1559 | INSSR  | + | - | - | G |



|       |        |      |       |   |   |   |   |
|-------|--------|------|-------|---|---|---|---|
| FBLN1 | P23142 | 98   | DNASL | - | G | - | G |
| FCGBP | Q9Y6R7 | 1743 | TNISI | + | - | G | - |
| FCGBP | Q9Y6R7 | 1830 | PNGTL | - | - | G | - |
| FCGBP | Q9Y6R7 | 5242 | ANLTT | - | - | G | - |
| FCN3  | O75636 | 189  | GNRTF | + | G | G | - |
| FETUA | P02765 | 156  | LNDTR | + | G | G | G |
| FETUA | P02765 | 176  | NNGSN | + | P | G | G |
| FETUB | Q9UGM5 | 37   | CNDSO | + | G | - | G |
| FETUB | Q9UGM5 | 136  | YNCTL | + | G | G | G |
| FHR1  | Q03591 | 126  | NNISC | + | P | P | P |
| FHR1  | Q03591 | 194  | GNWTE | + | G | - | G |
| FHR2  | P36980 | 126  | NNISC | + | P | P | P |
| FHR3  | Q02985 | 108  | GNSTE | + | G | G | G |
| FHR5  | Q9BXR6 | 400  | QNMTT | - | - | - | G |
| FIBA  | P02671 | 686  | FNRTW | + | - | G | G |
| FIBG  | P02679 | 78   | ENKTS | + | G | G | G |
| FINC  | P03751 | 528  | VNDTF | + | G | G | G |
| FINC  | P03751 | 542  | LNCTC | + | P | G | G |
| FINC  | P02751 | 1236 | DNLSP | - | G | - | - |
| FINC  | P02751 | 1244 | YNVSV | + | G | - | - |
| HEMO  | P02790 | 64   | DNGTM | + | G | P | G |
| HEMO  | P02790 | 187  | GNCSS | + | P | P | P |
| HEMO  | P02790 | 240  | RNGTG | + | G | P | G |
| HEMO  | P02790 | 246  | GNSTH | + | G | P | G |
| HEMO  | P02790 | 453  | QNVTS | + | P | P | P |
| HEP2  | P05546 | 49   | KNLSM | + | G | G | G |
| HEP2  | P05546 | 188  | VNASS | + | - | G | G |
| HGFA  | Q04756 | 290  | GNGTG | - | G | G | G |
| HGFL  | P26927 | 72   | YNVSS | - | - | - | G |
| HGFL  | P26927 | 296  | ANTTT | + | G | G | G |
| HGFL  | P26927 | 615  | GNDTV | + | G | G | - |

|       |        |     |       |   |   |   |   |
|-------|--------|-----|-------|---|---|---|---|
| HPT   | P00738 | 184 | HNLTT | + | G | P | P |
| HPT   | P00738 | 207 | LNHSE | + | G | G | G |
| HPT   | P00738 | 211 | ENATA | + | G | G | G |
| HPT   | P00738 | 241 | PNYSQ | + | P | P | P |
| HPTR  | P00739 | 126 | HNLTT | - | G | P | P |
| HPTR  | P00739 | 149 | LNHSE | - | G | G | G |
| HRG   | P04196 | 125 | FNCTT | + | P | P | P |
| HRG   | P04196 | 344 | NNSSD | + | G | - | - |
| IBP3  | P17936 | 116 | VNASA | + | G | G | P |
| IBP3  | P17936 | 199 | QNFSS | + | - | - | G |
| IC1   | P05155 | 238 | VNASR | + | G | G | G |
| IC1   | P05155 | 253 | SNNSD | + | G | P | G |
| ICAM2 | P13598 | 47  | VNCST | + | G | G | - |
| ICAM2 | P13598 | 82  | SNISH | + | G | G | G |
| ICAM2 | P13598 | 153 | GNETL | + | G | - | - |
| ICAM2 | P13598 | 187 | RNFSC | + | G | G | G |
| ICOSL | O75144 | 102 | FNVTP | + | G | - | - |
| IGHA1 | P01876 | 144 | ANLTC | + | - | G | - |
| IGHA1 | P01876 | 340 | VNVSV | + | - | G | G |
| IGHM  | P01871 | 46  | KNNSD | + | G | G | G |
| IGHM  | P01871 | 209 | QNASS | + | G | G | G |
| IGHM  | P01871 | 272 | TNISE | + | - | G | - |
| IGHM  | P01871 | 279 | PNATF | + | - | G | - |
| IGHM  | P01871 | 439 | YNVSL | + | G | P | - |
| IL6RB | P40189 | 379 | QNYTV | + | G | G | G |
| IL6RB | P40189 | 383 | VNATK | + | G | G | G |
| ITB1  | P05556 | 212 | QNCTS | + | G | G | - |
| ITIH1 | P19827 | 285 | QNLTN | + | G | G | G |
| ITIH1 | P19827 | 588 | ANLSS | + | G | G | - |
| ITIH2 | P19823 | 118 | SNFSM | + | P | P | P |
| ITIH4 | Q14624 | 517 | QNITF | + | G | G | G |

|       |        |     |       |   |   |   |   |
|-------|--------|-----|-------|---|---|---|---|
| KAIN  | P29622 | 108 | FNLTE | + | G | G | G |
| KAIN  | P29622 | 157 | LNDTM | + | G | P | G |
| KAIN  | P29622 | 238 | ENTTV | + | P | P | - |
| KLKB1 | P03952 | 127 | FNVSK | + | G | - | G |
| KLKB1 | P03952 | 308 | LNVTF | + | G | G | G |
| KLKB1 | P03952 | 453 | LNLSD | + | P | P | P |
| KLKB1 | P03952 | 494 | LNYTE | + | G | G | G |
| KNG1  | P01042 | 48  | QNQSN | + | P | P | P |
| KNG1  | P01042 | 169 | NNNTQ | + | P | P | - |
| KNG1  | P01042 | 205 | TNCSK | + | P | P | G |
| KNG1  | P01042 | 294 | NNATF | + | G | G | G |
| LAMP1 | P11279 | 84  | KENTS | + | G | - | - |
| LAMP2 | P13473 | 257 | PNTTH | + | G | G | G |
| LCAT  | P04180 | 44  | SNHTR | + | - | G | G |
| LCAT  | P04180 | 296 | FNYTG | + | G | - | G |
| LG3BP | Q08380 | 125 | TNETR | + | - | - | G |
| LUM   | P51884 | 88  | ENVTD | + | G | P | G |
| LUM   | P51884 | 127 | NNLTE | - | P | G | G |
| LUM   | P51884 | 160 | VNLTF | + | - | G | - |
| LYAM1 | P14151 | 60  | DNYTD | + | G | G | G |
| LYAM1 | P14151 | 104 | TNKSL | + | G | - | G |
| LYVE1 | Q9Y5Y7 | 53  | LNFTF | + | G | G | G |
| MASP1 | P48740 | 178 | DNRTC | + | - | G | G |
| MASP1 | P48740 | 407 | NNNTG | + | - | G | - |
| MMRN1 | Q13201 | 136 | SNSTL | + | - | G | G |
| MUC18 | P43121 | 56  | GNLSH | - | G | - | G |
| NCAM2 | O15394 | 474 | YNCTA | - | G | - | - |
| NRP1  | O14786 | 522 | NNGSD | + | - | G | - |
| PCSK9 | Q8NBP7 | 533 | ANCSV | + | G | G | - |
| PCYOX | Q9UHG3 | 196 | LNRTL | + | G | - | G |
| PGRP2 | Q96PD5 | 367 | ANATK | + | G | G | G |

|       |        |      |        |   |   |   |   |
|-------|--------|------|--------|---|---|---|---|
| PGRP2 | Q96PD5 | 485  | GNYTA  | + | G | G | G |
| PHLD  | P80108 | 94   | LNASV  | + | G | G | - |
| PHLD  | P80108 | 307  | RNLTT  | - | G | G | - |
| PHLD  | P80108 | 568  | ANWTV  | - | G | G | G |
| PHLD  | P80108 | 591  | DNRTL  | - | G | G | G |
| PHLD  | P80108 | 659  | MNGT   | + | G | G | G |
| PI16  | Q6UXB8 | 114  | YNLSA  | - | - | - | G |
| PI16  | Q6UXB8 | 403  | PNTSA  | - | G | G | G |
| PI16  | Q6UXB8 | 409  | ANATG  | - | G | G | G |
| PLMN  | P00747 | 308  | HN RTP | + | N | G | - |
| PLTP  | P55058 | 64   | YNI SE | + | G | P | G |
| PLTP  | P55058 | 143  | SNV SC | + | G | G | G |
| PLTP  | P55058 | 398  | SNH SA | + | G | N | G |
| PON1  | P27169 | 253  | ANW TL | + | G | G | G |
| PON1  | P27169 | 324  | ENG TV | + | P | P | G |
| PON3  | Q15166 | 323  | NNG SV | + | G | G | G |
| PRG4  | Q92954 | 1159 | RNG TL | + | G | G | G |
| PTGDS | P41222 | 51   | SNSS W | + | - | - | G |
| PTGDS | P41222 | 78   | LNL TS | + | G | - | G |
| PTPRJ | Q12913 | 391  | DNE SS | + | G | G | G |
| PTPRJ | Q12913 | 396  | SNY TY | + | G | G | G |
| QSOX1 | O00391 | 130  | KNG SG | + | P | P | P |
| SAP   | P07602 | 215  | TNST F | + | - | G | - |
| SEM4B | Q9NPR2 | 520  | ANCS L | - | - | - | G |
| SEPP1 | P49908 | 83   | SNIS Y | + | P | P | P |
| SEPP1 | P49908 | 119  | ENQ TD | + | G | G | G |
| SEPP1 | P49908 | 128  | LNG SK | + | G | G | G |
| SEPP1 | P49908 | 174  | GNCS L | - | G | G | G |
| SHBG  | P04278 | 380  | LNR SH | + | P | P | - |
| SHBG  | P04278 | 396  | GNG TD | + | G | G | G |
| SLAF5 | Q9UIB8 | 150  | CNV TL | - | G | - | - |

|      |        |      |       |   |   |   |   |
|------|--------|------|-------|---|---|---|---|
| TENA | P24821 | 184  | PNCSE | + | - | - | G |
| TFR1 | P02786 | 251  | VNGSI | + | - | G | - |
| THBG | P05543 | 36   | PNATL | + | G | G | G |
| THBG | P05543 | 165  | SNISA | + | G | G | - |
| THRB | P00734 | 121  | VNITR | + | - | G | - |
| THRB | P00734 | 143  | INSTT | + | G | G | G |
| THRB | P00734 | 416  | KNFTE | + | G | G | - |
| TRFE | P02787 | 630  | SNVTD | + | P | P | P |
| VASN | Q6EMK4 | 117  | TNETF | + | - | - | G |
| VNN1 | O95497 | 283  | PNSSR | + | - | G | G |
| VNN1 | O95497 | 353  | GNYTV | + | - | - | G |
| VTDB | P02774 | 288  | DNLST | - | P | P | P |
| VTNC | P04004 | 86   | NNATV | + | G | G | - |
| VTNC | P04004 | 169  | KNGSL | + | P | P | P |
| VTNC | P04004 | 242  | RNISD | + | G | G | G |
| VWF  | P04275 | 211  | CNISS | - | G | - | G |
| VWF  | P04275 | 666  | CNLTC | - | G | G | P |
| VWF  | P04275 | 1515 | FNRSK | + | G | G | G |
| VWF  | P04275 | 2223 | GNVSS | + | - | - | G |
| VWF  | P04275 | 2546 | RNVSC | + | G | - | - |
| ZA2G | P25311 | 109  | YNDNS | + | G | G | G |
| ZA2G | P25311 | 112  | SNGSH | + | G | G | G |
| ZA2G | P25311 | 128  | NNRSS | + | G | G | P |
| ZPI  | Q9UK55 | 295  | GNATM | + | - | G | - |

---

1. Zhou, H., Briscoe, A. C., Froehlich, J. W., and Lee, R. S. (2012) PNGase F catalyzes de-N-glycosylation in a domestic microwave. *Anal Biochem* 427, 33-35
2. Wada, Y., Azadi, P., Costello, C. E., Dell, A., Dwek, R. A., Geyer, H., Geyer, R., Kakehi, K., Karlsson, N. G., Kato, K., Kawasaki, N., Khoo, K. H., Kim, S., Kondo, A., Lattova, E., Mechref, Y., Miyoshi, E., Nakamura, K., Narimatsu, H., Novotny, M. V., Packer, N. H., Perreault, H., Peter-Katalinic, J., Pohlentz, G., Reinhold, V. N., Rudd, P. M., Suzuki, A., and Taniguchi, N. (2007) Comparison of the methods for profiling glycoprotein glycans-- HUPPO Human Disease Glycomics/Proteome Initiative multi-institutional study. *Glycobiology* 17, 411-422
3. Stumpo, K. A., and Reinhold, V. N. (2010) The N-glycome of human plasma. *J Proteome Res* 9, 4823-4830
